# Supplementary material for: Catalytic constructive deoxygenation of lignin-derived phenols: new C–C bond formation processes from imidazole-sulfonates and ether cleavage reactions
Source: Royal Society of Chemistry journal article supplement (doi:10.1039/c4cc04939j), 2014-01-01

## Supporting Information

### **Catalytic constructive deoxygenation of lignin-derived phenols: new C-C bond formation processes from imidazole-sulfonates and ether cleavage reactions.**

**Stuart M. Leckie, Gavin J. Harkness and Matthew L. Clarke\***

*School of Chemistry, University of St Andrews, EaStCHEM, St Andrews, Fife, UK, KY16 9ST. FAX: +44 (0)1334 463808; PHONE: +44 (0)1334 463850; email: mc28@st-andrews.ac.uk*

#### Table of Contents

|                                                                                                                          |     |
|--------------------------------------------------------------------------------------------------------------------------|-----|
| 1. General Information.....                                                                                              | S2  |
| 2. Full table of results for Kumada cross-coupling.....                                                                  | S4  |
| 3. Full results for the nitromethylation of 2-methoxyphenyl-1 <i>H</i> -imidazole-1-sulfonate.....                       | S5  |
| 4. Full results for the cyanation of 2-methoxyphenyl-1 <i>H</i> -imidazole-1-sulfonate.....                              | S7  |
| 5. Experimental details.....                                                                                             | S10 |
| 6. References.....                                                                                                       | S25 |
| 7. An example of a <sup>1</sup> H NMR showing how conversion and yield were calculated in the Kumada Cross-coupling..... | S26 |
| 8. Copies of <sup>1</sup> H and <sup>13</sup> C NMR spectra of all products.....                                         | S29 |

## 1. General Information

All catalytic reactions were carried out under an argon atmosphere using standard vacuum line techniques. Unless otherwise stated, all glassware used was flame dried and cooled under vacuum before use. Unless otherwise stated, all solvents were thoroughly degassed before use by either freeze-pump-thaw or rigorous purging with argon. 2-MeTHF (anhydrous  $\geq 99\%$ , Sigma-Aldrich) was degassed by freeze-pump-thaw before use in the Kumada cross-coupling and used as supplied for the Meyers reactions. Nitromethane (98+%, Alfa Aesar) was dried over powdered 3Å molecular sieves prior to degassing by rigorous purging with argon prior to use. *tert*-Amyl methyl ether (produced by INEOS Oligomers,  $\geq 99.0\%$  (GC), Sigma-Aldrich) was used as supplied for the Meyers reactions and degassed by rigorous purging with argon prior to use in the Kumada cross-coupling reactions. *tert*-Butanol (ACS 99+%, Alfa-Aesar) and distilled water were degassed by rigorous purging with argon for use in the cyanation procedure.

Unless stated chemicals were purchased from Acros-UK, Alfa Aesar, Apollo Scientific, Fluorochem, Sigma-Aldrich, or TCI and used without further purification. All Grignard reagents were used as supplied (Aldrich). Room temperature (rt) refers to 20-25 °C. Reflux conditions were obtained using an oil bath equipped with a contact thermometer. *In vacuo* refers to the use of a Heidolph Laborota 4001 rotary evaporator with a vacuum controller. Analytical thin layer chromatography (TLC) was performed on pre-coated aluminium plates (Kieselgel 60 F254 silica). TLC visualisation was carried out with ultraviolet light (254 nm), followed by staining with a 1% aqueous KMnO<sub>4</sub> solution. Flash silica chromatography was performed on Kieselgel 60 silica in the solvent system stated.

<sup>1</sup>H, <sup>13</sup>C and <sup>19</sup>F nuclear magnetic resonance (NMR) spectra were acquired on either a Bruker Avance 300 (300 MHz <sup>1</sup>H, 75 MHz <sup>13</sup>C and 282 MHz <sup>19</sup>F), a Bruker Avance II 400 (400 MHz <sup>1</sup>H, 100 MHz <sup>13</sup>C and 376 MHz <sup>19</sup>F) or a Bruker Ultrashield 500 (500 MHz <sup>1</sup>H, 125 MHz <sup>13</sup>C and 470 MHz <sup>19</sup>F) spectrometer at ambient temperature in the deuterated solvent stated. All chemical shifts are quoted in parts per million (ppm) relative to the residual solvent as the internal standard. All coupling constants, *J*, are quoted in Hz and reported high to low. Multiplicities are indicated by: s

(singlet), d (doublet), t (triplet), q (quartet) and m (multiplet), The abbreviation app is used to denote apparent.

Infrared spectra ( $\nu_{\text{max}}$ ) were recorded on a Shimadzu IRAffinity-1 using a Pike attenuated total reflectance (ATR) accessory. Only characteristic absorbances are quoted.

Melting points were recorded on an Gallenkamp melting point apparatus and are uncorrected. Dec refers to decomposition.

Mass spectrometric ( $m/z$ ) data were acquired by electrospray ionisation (ESI) or chemical ionisation (CI) at the University of St Andrews Mass Spectrometry facility ([A]<sup>+</sup> quoted). High resolution ESI was carried out on a Micromass LCT spectrometer and high resolution CI was carried out on a Micromass GCT spectrometer. Values are quoted as a ratio of mass to charge in Daltons.

2-Methoxyphenyl-1*H*-imidazole-1-sulfonate<sup>1</sup> and 2-(2-methoxyphenyl)benzo[*d*]oxazole<sup>2</sup> were prepared according to literature procedures.

## 2. Full table of results for Kumada cross-coupling

Table S-1: Comparison of Pd catalysts **10** and **11** in Kumada cross-coupling.

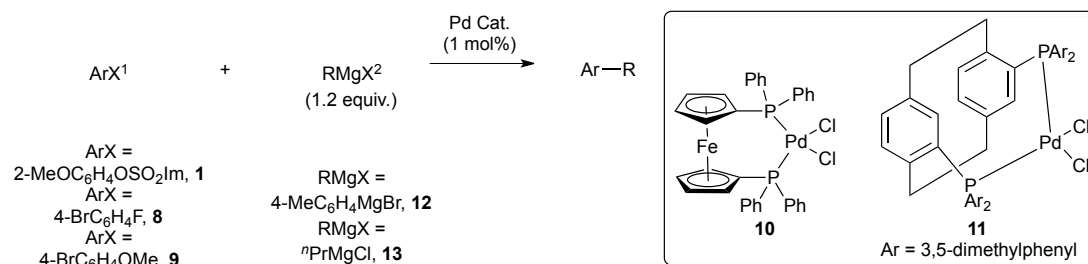

| Entry          | ArX      | Grignard  | Catalyst  | Solvent            | T (°C) | Conversion <sup>1</sup> (Time)        | Product Yield <sup>2</sup> (Time)    |
|----------------|----------|-----------|-----------|--------------------|--------|---------------------------------------|--------------------------------------|
| 1              | <b>1</b> | <b>12</b> | <b>10</b> | 2-MeTHF            | rt     | 33% (4 h)<br>76% (23 h)               | <5% (4 h)<br><5% (23 h)              |
| 2              | <b>1</b> | <b>12</b> | <b>11</b> | 2-MeTHF            | rt     | 73% (4 h)<br>75% (23 h)               | <5% (4 h)<br><5% (23 h)              |
| 3              | <b>1</b> | <b>12</b> | <b>10</b> | <sup>t</sup> AmOMe | 50     | 84% (1 h)<br>91% (24 h)               | 7% (1 h)<br>5% (24 h)                |
| 4              | <b>1</b> | <b>12</b> | <b>11</b> | <sup>t</sup> AmOMe | 50     | >99% (17 h)                           | >99% (17 h)<br>[63%]                 |
| 5              | <b>1</b> | <b>12</b> | <b>11</b> | <sup>t</sup> AmOMe | 50     | >99% (1 h)                            | >94% (1 h)                           |
| 6              | <b>8</b> | <b>12</b> | <b>10</b> | 2-MeTHF            | rt     | 16% (1 h)<br>16% (4 h)<br>67% (24 h)  | n.d. <sup>3</sup>                    |
| 7              | <b>8</b> | <b>12</b> | <b>11</b> | 2-MeTHF            | rt     | 66% (1 h)<br>95% (4 h)                | n.d. <sup>3</sup>                    |
| 8 <sup>4</sup> | <b>8</b> | <b>12</b> | <b>11</b> | 2-MeTHF            | rt     | n.d. <sup>5</sup>                     | [60%] (4 h)                          |
| 9              | <b>8</b> | <b>13</b> | <b>10</b> | 2-MeTHF            | rt     | 13% (1 h)<br>23% (4 h)                | <5% (1 h)<br>5% (4 h)                |
| 10             | <b>8</b> | <b>13</b> | <b>11</b> | 2-MeTHF            | rt     | 85% (1 h)<br>94% (4 h)                | 80% (1 h)<br>94% (4 h)               |
| 11             | <b>8</b> | <b>13</b> | <b>11</b> | 2-MeTHF            | rt     | n.d. <sup>5</sup>                     | [74%] (24 h)                         |
| 12             | <b>9</b> | <b>12</b> | <b>10</b> | 2-MeTHF            | rt     | 25% (18 h)                            | 18% (18 h)                           |
| 13             | <b>9</b> | <b>12</b> | <b>11</b> | 2-MeTHF            | rt     | 75% (18 h)                            | 69% (18 h)                           |
| 14             | <b>9</b> | <b>12</b> | <b>10</b> | 2-MeTHF            | 40     | 16% (1 h)<br>51% (4 h)<br>>99% (22 h) | 8% (1 h)<br>43% (4 h)<br>91% (22 h)  |
| 15             | <b>9</b> | <b>12</b> | <b>11</b> | 2-MeTHF            | 40     | 60% (1 h)<br>89% (4 h)<br>>99% (22 h) | 48% (1 h)<br>77% (4 h)<br>88% (22 h) |
| 16             | <b>9</b> | <b>12</b> | <b>11</b> | 2-MeTHF            | 40     | n.d. <sup>5</sup>                     | [88%] (22 h)                         |

<sup>1</sup>Conversion = %ArX consumed. <sup>2</sup>Product yield was determined by <sup>1</sup>H NMR analysis using either 1-methylnaphthalene (entries 1-5, 12-16) or 1-fluoronaphthalene (entries 6-11) as an internal standard against a t<sub>0</sub>. Values in [brackets] are isolated yields of pure products after chromatography. <sup>3</sup>Due to the overlap of multiple signals in the <sup>1</sup>H NMR the product yield was not determined. <sup>4</sup>1.1 equiv. Grignard used. <sup>5</sup>No samples were taken on these entries as this would reduce the isolated yield.

### 3. Further results for nitromethylation of 2-methoxyphenyl-1*H*-imidazole-1-sulfonate

Table S-2. Further results for the optimisation of the nitromethylation of 2-methoxyphenyl-1*H*-imidazole-1-sulfonate, **1**.

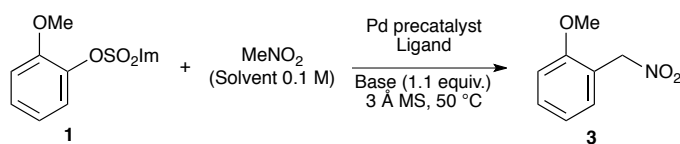

| Entry           | Catalyst (mol%)                           | Ligand (mol%)                          | Base                            | Time (h) | Ratio 3:1 (yield) |
|-----------------|-------------------------------------------|----------------------------------------|---------------------------------|----------|-------------------|
| 1               | Pd <sub>2</sub> dba <sub>3</sub> (5 mol%) | CM-Phos (12 mol%)                      | Cs <sub>2</sub> CO <sub>3</sub> | 16       | <5:95             |
| 2               | Pd <sub>2</sub> dba <sub>3</sub> (5 mol%) | DtBPF (12 mol%)                        | Cs <sub>2</sub> CO <sub>3</sub> | 16       | <5:95             |
| 3               | Pd <sub>2</sub> dba <sub>3</sub> (5 mol%) | PCy <sub>3</sub> (12 mol%)             | Cs <sub>2</sub> CO <sub>3</sub> | 16       | <5:95             |
| 4               | Pd(TFA) <sub>2</sub> (5 mol%)             | XPhos (12 mol%)                        | Cs <sub>2</sub> CO <sub>3</sub> | 64       | 19:81             |
| 5               | Pd <sub>2</sub> dba <sub>3</sub> (5 mol%) | DtBPF (6 mol%)                         | Cs <sub>2</sub> CO <sub>3</sub> | 23       | <5:95             |
| 6               | Pd <sub>2</sub> dba <sub>3</sub> (5 mol%) | PPh <sub>3</sub> (12 mol%)             | Cs <sub>2</sub> CO <sub>3</sub> | 23       | <5:95             |
| 7               | Pd <sub>2</sub> dba <sub>3</sub> (5 mol%) | (±)-BINAP (6 mol%)                     | Cs <sub>2</sub> CO <sub>3</sub> | 23       | <5:95             |
| 8               | Pd <sub>2</sub> dba <sub>3</sub> (5 mol%) | BrettPhos (12 mol%)                    | Cs <sub>2</sub> CO <sub>3</sub> | 23       | 24:76             |
| 9               | Pd <sub>2</sub> dba <sub>3</sub> (5 mol%) | TrixiePhos (12 mol%)                   | Cs <sub>2</sub> CO <sub>3</sub> | 23       | 74:26             |
| 10              | Pd <sub>2</sub> dba <sub>3</sub> (5 mol%) | TrixiePhos (12 mol%)                   | Cs <sub>2</sub> CO <sub>3</sub> | 64       | >95:5             |
| 11              | Pd <sub>2</sub> dba <sub>3</sub> (5 mol%) | DCyPF (6 mol%)                         | Cs <sub>2</sub> CO <sub>3</sub> | 64       | <5:95             |
| 12              | Pd <sub>2</sub> dba <sub>3</sub> (5 mol%) | PhPCy <sub>2</sub> (12 mol%)           | Cs <sub>2</sub> CO <sub>3</sub> | 64       | <5:95             |
| 13              | Pd <sub>2</sub> dba <sub>3</sub> (5 mol%) | <i>t</i> -BuX-Phos (12 mol%)           | Cs <sub>2</sub> CO <sub>3</sub> | 64       | 33:67             |
| 14              | Pd <sub>2</sub> dba <sub>3</sub> (5 mol%) | JohnPhos (12 mol%)                     | Cs <sub>2</sub> CO <sub>3</sub> | 64       | <5:95             |
| 15              | Pd <sub>2</sub> dba <sub>3</sub> (5 mol%) | <i>t</i> -BuPPh <sub>2</sub> (12 mol%) | Cs <sub>2</sub> CO <sub>3</sub> | 64       | <5:95             |
| 16              | Pd <sub>2</sub> dba <sub>3</sub> (5 mol%) | TrixiePhos (12 mol%)                   | K <sub>3</sub> PO <sub>4</sub>  | 23       | 13:87             |
| 17              | Pd(OAc) <sub>2</sub> (10 mol%)            | TrixiePhos (30 mol%)                   | Cs <sub>2</sub> CO <sub>3</sub> | 64       | 46:54             |
| 18 <sup>1</sup> | Pd <sub>2</sub> dba <sub>3</sub> (5 mol%) | TrixiePhos (12 mol%)                   | Cs <sub>2</sub> CO <sub>3</sub> | 64       | >95:5 (65%)       |

<sup>1</sup>Reaction was performed on a 2.5 mmol scale.

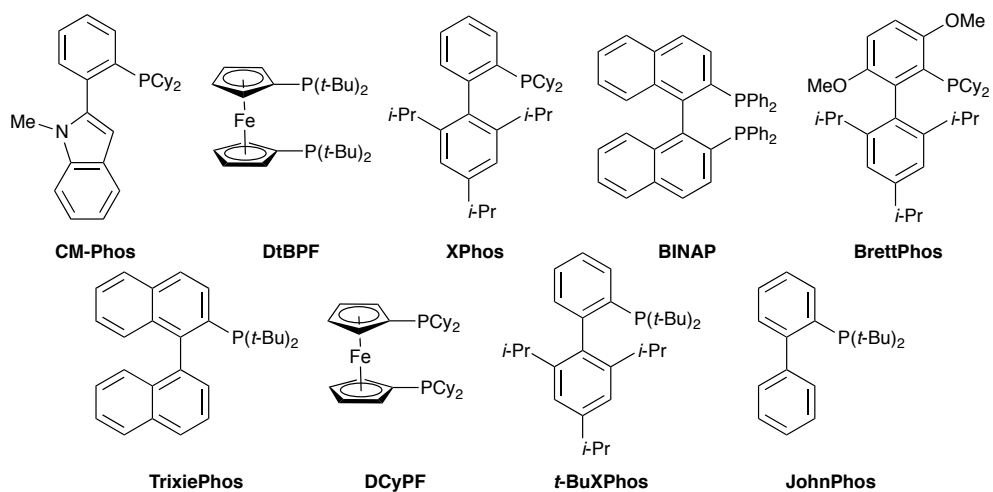

Figure S-1: Ligands used in the nitromethylation of 2-methoxyphenyl-1*H*-imidazole-1-sulfonate, **1**.

#### 4. Full results for the cyanation of 2-methoxyphenyl-1*H*-imidazole-1-sulfonate

Table S-3: Initial results for the optimisation of the cyanation of 2-methoxyphenyl-1*H*-imidazole-1-sulfonate, **1**.

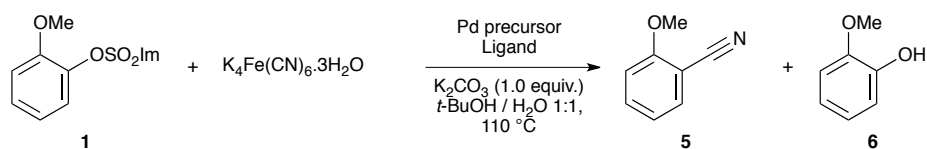

| Entry                | Catalyst (mol%)                 | Ligand (mol%)                       | $K_4Fe(CN)_6 \cdot 3H_2O$ (mol%) | Time (h) | Product Ratio <sup>1</sup> 5:1:6 (yield) |
|----------------------|---------------------------------|-------------------------------------|----------------------------------|----------|------------------------------------------|
| <b>1</b>             | Pd(OAc) <sub>2</sub> (5 mol%)   | X-Phos (10 mol%)                    | 50                               | 24       | 72:24:4                                  |
| <b>2<sup>2</sup></b> | Pd(OAc) <sub>2</sub> (5 mol%)   | X-Phos (10 mol%)                    | 50                               | 24       | 1:90:9                                   |
| <b>3</b>             | Pd(OAc) <sub>2</sub> (5 mol%)   | X-Phos (10 mol%)                    | 50                               | 72       | 97:2:1 <sup>3</sup>                      |
| <b>4</b>             | Pd(OAc) <sub>2</sub> (1.5 mol%) | X-Phos (3 mol%)                     | 50                               | 72       | 5:26:69                                  |
| <b>5</b>             | None                            | None                                | 50                               | 72       | 0:66:44 <sup>3</sup>                     |
| <b>6</b>             | Pd(OAc) <sub>2</sub> (5 mol%)   | X-Phos (10 mol%)                    | 50                               | 72       | 99:0:1 (50%)                             |
| <b>7</b>             | Pd(OAc) <sub>2</sub> (5 mol%)   | X-Phos (10 mol%)                    | 50                               | 48       | 98:0:2                                   |
| <b>8</b>             | Pd(OAc) <sub>2</sub> (5 mol%)   | X-Phos-SO <sub>3</sub> Na (10 mol%) | 50                               | 48       | 0:90:10                                  |
| <b>9</b>             | Pd(TFA) <sub>2</sub> (5 mol%)   | X-Phos (10 mol%)                    | 50                               | 48       | 98:0:2                                   |
| <b>10</b>            | Pd(TFA) <sub>2</sub> (5 mol%)   | X-Phos-SO <sub>3</sub> Na (10 mol%) | 50                               | 48       | 0:89:11                                  |
| <b>11</b>            | Pd(TFA) <sub>2</sub> (1 mol%)   | X-Phos (2 mol%)                     | 50                               | 48       | 68:25:7                                  |
| <b>12</b>            | Pd(TFA) <sub>2</sub> (5 mol%)   | X-Phos (10 mol%)                    | 21                               | 48       | 88:0:11                                  |
| <b>13</b>            | Pd(TFA) <sub>2</sub> (1 mol%)   | X-Phos (2 mol%)                     | 21                               | 48       | 89:0:11 (67%)                            |
| <b>14</b>            | Pd(TFA) <sub>2</sub> (1 mol%)   | X-Phos (2 mol%)                     | 21                               | 24       | 67:18:15                                 |
| <b>15</b>            | Pd(TFA) <sub>2</sub> (1 mol%)   | X-Phos (3 mol%)                     | 21                               | 24       | 88:0:12                                  |
| <b>16</b>            | Pd(TFA) <sub>2</sub> (1 mol%)   | PPh <sub>3</sub> (3 mol%)           | 21                               | 24       | 88:8:4                                   |
| <b>17</b>            | Pd(TFA) <sub>2</sub>            | P(Cy) <sub>3</sub>                  | 21                               | 24       | 0:83:17                                  |

|           |                                  |                                              |    |    |          |
|-----------|----------------------------------|----------------------------------------------|----|----|----------|
|           | (1 mol%)                         | (3 mol%)                                     |    |    |          |
| <b>18</b> | Pd(TFA) <sub>2</sub><br>(1 mol%) | P( <i>o</i> -tolyl) <sub>3</sub><br>(3 mol%) | 21 | 24 | 7:77:16  |
| <b>19</b> | Pd(TFA) <sub>2</sub><br>(1 mol%) | CM-Phos<br>(3 mol%)                          | 21 | 24 | 77:12:11 |
| <b>20</b> | Pd(TFA) <sub>2</sub><br>(1 mol%) | DtBPF<br>(2 mol%)                            | 21 | 24 | 14:66:20 |
| <b>21</b> | Pd(TFA) <sub>2</sub><br>(1 mol%) | DtBDPPF<br>(2 mol%)                          | 21 | 24 | 34:50:16 |

<sup>1</sup>As judged by <sup>1</sup>H NMR of the crude reaction mixture. <sup>2</sup>*t*-BuOH was used as the solvent.

<sup>3</sup>Multiple other products were also formed.

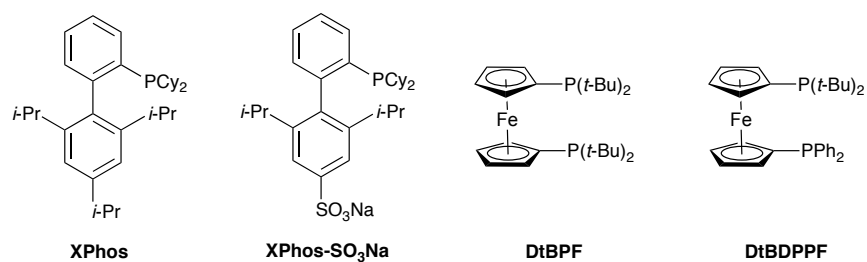

Figure S-2: Ligands used in the cyanation of 2-methoxyphenyl-1*H*-imidazole-1-sulfonate, **1**.



Table S-4: Catalyst optimisation of the cyanation of 2-methoxyphenyl-1*H*-imidazole-1-sulfonate, **1**.

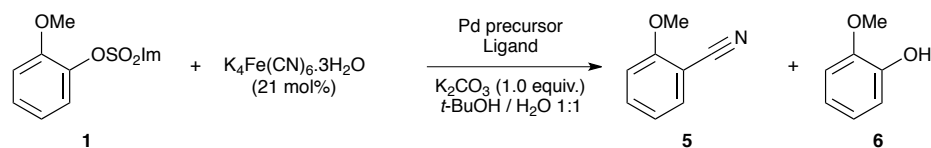

| Entry | Pd (mol%)                       | Ligand (mol%)                                           | Temp (°C) | Time (h) | Product Ratio <sup>1</sup> 5:1:6 (yield) |
|-------|---------------------------------|---------------------------------------------------------|-----------|----------|------------------------------------------|
| 1     | Pd(TFA) <sub>2</sub> (1 mol%)   | X-Phos (3 mol%)                                         | 110       | 24       | 88:0:12                                  |
| 2     | Pd(TFA) <sub>2</sub> (1 mol%)   | PPh <sub>3</sub> (3 mol%)                               | 110       | 24       | 88:8:4                                   |
| 3     | Pd(TFA) <sub>2</sub> (1 mol%)   | PPh <sub>3</sub> (3 mol%)                               | 100       | 48       | 95:0:5                                   |
| 4     | Pd(TFA) <sub>2</sub> (0.5 mol%) | PPh <sub>3</sub> (1.5 mol%)                             | 100       | 48       | 29:64:7                                  |
| 5     | Pd(TFA) <sub>2</sub> (1 mol%)   | PPh <sub>3</sub> (3 mol%)                               | 90        | 48       | 94:5:1 (71%)                             |
| 6     | Pd(TFA) <sub>2</sub> (1 mol%)   | PPh <sub>3</sub> (3 mol%)                               | 70        | 48       | ~5% <sup>2</sup> <b>5</b>                |
| 7     | Pd(TFA) <sub>2</sub> (1 mol%)   | PPh <sub>3</sub> (3 mol%)                               | 50        | 48       | 0% <sup>2</sup> <b>5</b>                 |
| 8     | Pd(TFA) <sub>2</sub> (1 mol%)   | PPh <sub>3</sub> (3 mol%)                               | rt        | 48       | 0% <sup>2</sup> <b>5</b>                 |
| 9     | Pd(TFA) <sub>2</sub> (1 mol%)   | P(4-MeOPh) <sub>3</sub> (3 mol%)                        | 90        | 48       | 90:8:2                                   |
| 10    | Pd(TFA) <sub>2</sub> (1 mol%)   | P(C <sub>6</sub> F <sub>5</sub> ) <sub>3</sub> (3 mol%) | 90        | 48       | 0:97:3                                   |
| 11    | Pd(TFA) <sub>2</sub> (1 mol%)   | Ph <sub>2</sub> P(2-pyridyl) (3 mol%)                   | 90        | 48       | 18:76:6                                  |
| 12    | Pd(TFA) <sub>2</sub> (1 mol%)   | P(3,5-CF <sub>3</sub> Ph) <sub>3</sub> (3 mol%)         | 90        | 48       | 0:99:9                                   |
| 13    | Pd(TFA) <sub>2</sub> (0.5 mol%) | P(4-MeOPh) <sub>3</sub> (1.5 mol%)                      | 90        | 48       | 2:92:6                                   |
| 14    | Pd(TFA) <sub>2</sub> (0.5 mol%) | P(2-MeOPh) <sub>3</sub> (1.5 mol%)                      | 90        | 48       | 0:85:15                                  |

<sup>1</sup>As judged by <sup>1</sup>H NMR of the crude reaction mixture. <sup>2</sup>Multiple other products were also formed.

## 5. Experimental details

### Experimental details for the Kumada cross-coupling

**General Procedure 1:** An aryl halide or 2-methoxyphenyl-1*H*-imidazole-1-sulfonate and an internal standard were added to a flame dried Schlenk flask under an inert atmosphere. Degassed solvent was then added to make a solution. A  $t_0$  sample (approximately 10  $\mu\text{L}$ ) was taken and analysed by  $^1\text{H}$  NMR (to calibrate the ratio of internal standard to starting material). The desired palladium catalyst [ $\text{L}_2\text{PdCl}_2$ ] ( $\text{L}_2$  = diphosphine) was added to a second flame dried Schlenk flask and placed under an inert atmosphere. Solvent was then added. The solution containing the electrophile and internal standard was added to the palladium catalyst solution *via* syringe. The requisite Grignard solution was added dropwise over 30 minutes. The reaction mixture was stirred at a specific temperature for a specific time; tracking the reaction progress by  $^1\text{H}$  NMR. Following reaction completion (as determined by analysis of the  $^1\text{H}$  NMR), the mixture was allowed to cool to ambient temperature and either saturated aqueous ammonium chloride or dilute hydrochloric acid (1M) was added. The aqueous phase was extracted three times with ethyl acetate or diethyl ether, dried over sodium sulfate and concentrated under reduced pressure. The resulting crude product was purified by column chromatography on silica gel.

Table S-1, Entry 1: Following **General Procedure 1**, 2-methoxyphenyl-1*H*-imidazole-1-sulfonate (127.1 mg, 0.50 mmol) and 1-methylnaphthalene (60  $\mu\text{L}$ , 0.42 mmol) were dissolved in 2-MeTHF (400  $\mu\text{L}$ ) and  $\sim 10$   $\mu\text{L}$  of the solution was diluted in  $\text{CDCl}_3$  and analysed by  $^1\text{H}$  NMR (to give a  $t_0$  spectra). The remainder of this solution was added to a second Schlenk flask containing [ $\text{PdCl}_2(\text{dppf})$ ] (3.7 mg, 0.005 mmol). *para*-Tolylmagnesium bromide solution (1.2 mL, 0.5M in  $\text{Et}_2\text{O}$ , 0.60 mmol) was added dropwise over 30 minutes. The reaction mixture was stirred at room temperature for 4 hours. The mixture was analysed by taking a sample ( $\sim 10$   $\mu\text{L}$ ), diluting with  $\text{CDCl}_3$  and obtaining a  $^1\text{H}$  NMR spectrum. The reaction was incomplete therefore stirring was continued for a further 19 hours before a second sample was taken. The reaction was not worked-up.

Table S-1, Entry 2: Following **General Procedure 1**, 2-methoxyphenyl-1*H*-imidazole-1-sulfonate (127.1 mg, 0.50 mmol) and 1-methylnaphthalene (60  $\mu$ L, 0.42 mmol) were dissolved in 2-MeTHF (400  $\mu$ L) and  $\sim$ 10  $\mu$ L of the solution was diluted in CDCl<sub>3</sub> and analysed using <sup>1</sup>H NMR (to give a *t*<sub>0</sub> spectra). The remainder of this solution was added to second Schlenk flask containing [PdCl<sub>2</sub>(*S*)-Xyl-Phanephos] (4.3 mg, 0.005 mmol). *para*-Tolylmagnesium bromide solution (1.2 mL, 0.5M in Et<sub>2</sub>O, 0.60 mmol) was added dropwise over 30 minutes. The reaction mixture was stirred at room temperature for 4 hours. The mixture was analysed by taking a sample ( $\sim$ 10  $\mu$ L), diluting with CDCl<sub>3</sub> and obtaining a <sup>1</sup>H NMR spectrum. The reaction was incomplete therefore stirring was continued for a further 19 hours before a second sample was taken. The reaction was not worked-up.

Table S-1, Entry 3: Following **General Procedure 1**, 2-methoxyphenyl-1*H*-imidazole-1-sulfonate (63.6 mg, 0.25 mmol) and 1-methylnaphthalene (30  $\mu$ L, 0.21 mmol) were dissolved in *tert*-amylmethyl ether (500  $\mu$ L) and  $\sim$ 10  $\mu$ L of the solution was diluted in CDCl<sub>3</sub> and analysed using <sup>1</sup>H NMR (to give a *t*<sub>0</sub> spectra). The remainder of this solution was added to second Schlenk flask containing [PdCl<sub>2</sub>(dppf)] (1.8 mg, 0.0025 mmol). *para*-Tolylmagnesium bromide solution (600  $\mu$ L, 0.5M in Et<sub>2</sub>O, 0.30 mmol) was added dropwise over 30 minutes. The reaction mixture was stirred at 50 °C for 1 hour. The mixture was analysed by taking a sample ( $\sim$ 10  $\mu$ L), diluting with CDCl<sub>3</sub> and obtaining a <sup>1</sup>H NMR spectrum. The reaction was incomplete therefore stirring was continued for a further 23 hours before a second sample was taken. The reaction was not worked-up.

### 2-Methoxy-4'-methyl-1,1'-biphenyl, 2

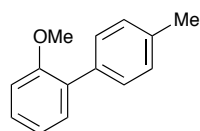

Table S-1, Entry 4: Following **General Procedure 1**, 2-methoxyphenyl-1*H*-imidazole-1-sulfonate (127.1 mg, 0.50 mmol) and 1-methylnaphthalene (60  $\mu$ L, 0.21 mmol) were dissolved in *tert*-amylmethyl ether (1.0 mL) and  $\sim$ 10  $\mu$ L of the solution was diluted in CDCl<sub>3</sub> and analysed using <sup>1</sup>H NMR (to give a *t*<sub>0</sub> spectra). The remainder of this solution was added to second Schlenk flask containing [PdCl<sub>2</sub>(*S*)-Xyl-Phanephos] (4.3 mg, 0.005 mmol). *para*-Tolylmagnesium bromide solution (1.2

mL, 0.5M in Et<sub>2</sub>O, 0.60 mmol) was added dropwise over 30 minutes. The reaction mixture was stirred at 50 °C for 17 hours. The mixture was analysed by taking a sample (~10 μL), diluting with CDCl<sub>3</sub> and obtaining a <sup>1</sup>H NMR spectrum. The reaction mixture was allowed to cool to ambient temperature and saturated aqueous ammonium chloride solution (5 mL) was added and the aqueous phase was extracted with EtOAc (3 × 10 mL). The combined organics were dried over Na<sub>2</sub>SO<sub>4</sub> and concentrated under reduced pressure. The resulting oil was purified by column chromatography on silica gel (eluent petrol:hexane, 10:90 to 100:0) to give 2-methoxy-4'-methyl-1,1'-biphenyl as a white solid (62.2 mg, 63%), with spectroscopic data in accordance with the literature;<sup>3</sup> δ<sub>H</sub> (500 MHz, CDCl<sub>3</sub>) 7.47 (2H, d, *J* 8.1), 7.36-7.31 (2H, m), 7.26 (2H, d, *J* 8.1), 7.08-6.99 (2H, m), 3.83 (3H, s), 2.43 (3H, s); δ<sub>C</sub> (100 MHz, CDCl<sub>3</sub>) 156.6, 136.7, 135.7, 130.9, 130.8, 129.5, 128.9, 128.5, 120.9, 111.3, 55.7, 21.3; *m/z* HRMS (ESI<sup>+</sup>) C<sub>14</sub>H<sub>14</sub>ONa<sup>+</sup> ([M+Na]<sup>+</sup>) requires 221.0942; found 221.0930 (-3.1 ppm).

Table S-1, Entry 5: Following **General Procedure 1**, 2-methoxyphenyl-1*H*-imidazole-1-sulfonate (63.6 mg, 0.25 mmol) and 1-methylnaphthalene (30 μL, 0.21 mmol) were dissolved in *tert*-amylmethyl ether (500 μL) and ~10 μL of the solution was diluted in CDCl<sub>3</sub> and analysed using <sup>1</sup>H NMR (to give a *t*<sub>0</sub> spectra). The remainder of this solution was added to second Schlenk flask containing [PdCl<sub>2</sub>(*S*-Xyl-Phanephos)] (2.2 mg, 0.0025 mmol). *para*-Tolylmagnesium bromide solution (600 μL, 0.5M in Et<sub>2</sub>O, 0.30 mmol) was added dropwise over 30 minutes. The reaction mixture was stirred at 50 °C for 1 hour. The mixture was analysed by taking a sample (~10 μL), diluting with CDCl<sub>3</sub> and obtaining a <sup>1</sup>H NMR spectrum which indicated complete conversion to 2-methoxy-4'-methyl-1,1'-biphenyl. The reaction was not worked-up.

Table S-1, Entry 6: Following **General Procedure 1**, 4-bromofluorobenzene (110 μL, 1.0 mmol) and 1-fluoronaphthalene (120 μL, 0.93 mmol) were dissolved in 2-MeTHF (900 μL) and ~10 μL of the solution was diluted in 2-MeTHF and analysed using <sup>1</sup>H NMR (to give a *t*<sub>0</sub> spectra). The remainder of this solution was added to second Schlenk flask containing [PdCl<sub>2</sub>(dppf)] (7.3 mg, 0.01 mmol). *para*-Tolylmagnesium bromide solution (2.4 mL, 0.5M in Et<sub>2</sub>O, 1.2 mmol) was added dropwise over 30

minutes. The reaction mixture was stirred at rt for 1 hour. The mixture was analysed by taking a sample (~10  $\mu\text{L}$ ), diluting with 2-MeTHF and obtaining a  $^1\text{H}$  NMR spectrum. The reaction was incomplete therefore stirring was continued and further samples taken after 4 and 23 hours. The reaction was not worked-up.

Table S-1, Entry 7: Following **General Procedure 1**, 4-bromofluorobenzene (110  $\mu\text{L}$ , 1.0 mmol) and 1-fluoronaphthalene (120  $\mu\text{L}$ , 0.93 mmol) were dissolved in 2-MeTHF (900  $\mu\text{L}$ ) and ~10  $\mu\text{L}$  of the solution was diluted in 2-MeTHF and analysed using  $^1\text{H}$  NMR (to give a  $t_0$  spectra). The remainder of this solution was added to second Schlenk flask containing  $[\text{PdCl}_2(\text{S})\text{-Xyl-Phanephos}]$  (8.7 mg, 0.01 mmol). *para*-Tolylmagnesium bromide solution (2.4 mL, 0.5M in  $\text{Et}_2\text{O}$ , 1.2 mmol) was added dropwise over 30 minutes. The reaction mixture was stirred at rt for 1 hour. The mixture was analysed by taking a sample (~10  $\mu\text{L}$ ), diluting with 2-MeTHF and obtaining a  $^1\text{H}$  NMR spectrum. The reaction was incomplete therefore stirring was continued and a further sample was taken after 4 hours. The reaction was not worked-up.

#### 4-Fluoro-4'-methyl-1,1'-biphenyl

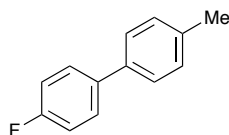

Table S-1, Entry 8: Following **General Procedure 1**, 4-bromofluorobenzene (110  $\mu\text{L}$ , 1.0 mmol) and  $[\text{PdCl}_2(\text{S})\text{-Xyl-Phanephos}]$  (8.7 mg, 0.01 mmol) were dissolved in 2-MeTHF (1.0 mL) and *para*-tolylmagnesium bromide solution (2.2 mL, 0.5M in  $\text{Et}_2\text{O}$ , 1.1 mmol) was added dropwise over 30 minutes. The reaction mixture was stirred at rt for 4 hours. The mixture was analysed by taking a sample (~10  $\mu\text{L}$ ), diluting with  $\text{CDCl}_3$  and obtaining a  $^1\text{H}$  NMR spectrum. Aqueous HCl (5 mL, 1M) was added and the aqueous phase extracted with EtOAc (3  $\times$  10 mL). The combined organics were dried over  $\text{Na}_2\text{SO}_4$  and concentrated under reduced pressure. The resulting oil was purified by column chromatography on silica gel (eluent hexane) to give 4-fluoro-4'-methyl-1,1'-biphenyl as a white solid (111.7 mg, 60%) with spectroscopic data in accordance with the literature;<sup>4</sup>  $\delta_{\text{H}}$  (500 MHz,  $\text{CDCl}_3$ ) 7.57-7.53 (2H, m), 7.47 (2H, d,  $J$  8.0), 7.27 (2H, d,  $J$  8.0), 7.17-7.11 (2H, m), 2.42 (1H, s);  $\delta_{\text{F}}$  (470 MHz,  $\text{CDCl}_3$ ) –

116.3;  $\delta_C$  (125 MHz,  $\text{CDCl}_3$ ) 162.4 (d,  $J$  245.5), 137.5, 137.4 (d,  $J$  2.94), 137.2, 129.7, 128.6 (d,  $J$  7.78), 127.0, 115.7 (d,  $J$  21.5), 21.2;  $m/z$  HRMS ( $\text{EI}^+$ )  $\text{C}_{13}\text{H}_{11}\text{F}^+$  ( $[\text{M}]^+$ ) requires 186.0845; found 186.0839 (–3.1 ppm). Also isolated was a 66:34 mixture (as judged by  $^1\text{H}$  NMR analysis) of 4-fluoro-4'-methyl-1,1'-biphenyl and 4,4'-dimethylbiphenyl as a white solid (46.3 mg).

Table S-1, Entry 9: Following **General Procedure 1**, 4-bromofluorobenzene (110  $\mu\text{L}$ , 1.0 mmol) and 1-fluoronaphthalene (120  $\mu\text{L}$ , 0.93 mmol) were dissolved in 2-MeTHF (900  $\mu\text{L}$ ) and  $\sim 10$   $\mu\text{L}$  of the solution was diluted in 2-MeTHF and analysed using  $^1\text{H}$  NMR (to give a  $t_0$  spectra). The remainder of this solution was added to second Schlenk flask containing  $[\text{PdCl}_2(\text{dppf})]$  (7.3 mg, 0.01 mmol). *n*-Propylmagnesium chloride solution (600  $\mu\text{L}$ , 2.0M in  $\text{Et}_2\text{O}$ , 1.2 mmol) was added dropwise over 30 minutes. The reaction mixture was stirred at rt for 1 hour. The mixture was analysed by taking a sample ( $\sim 10$   $\mu\text{L}$ ), diluting with 2-MeTHF and obtaining a  $^1\text{H}$  NMR spectrum. The reaction was incomplete therefore stirring was continued and a further samples taken after 4 hours. The reaction was not worked-up.

Table S-1, Entry 10: Following **General Procedure 1**, 4-bromofluorobenzene (110  $\mu\text{L}$ , 1.0 mmol) and 1-fluoronaphthalene (120  $\mu\text{L}$ , 0.93 mmol) were dissolved in 2-MeTHF (900  $\mu\text{L}$ ) and  $\sim 10$   $\mu\text{L}$  of the solution was diluted in 2-MeTHF and analysed using  $^1\text{H}$  NMR (to give a  $t_0$  spectra). The remainder of this solution was added to second Schlenk flask containing  $[\text{PdCl}_2(\text{S})\text{-Xyl-Phanephos}]$  (8.7 mg, 0.01 mmol). *n*-Propylmagnesium chloride solution (600  $\mu\text{L}$ , 2.0M in  $\text{Et}_2\text{O}$ , 1.2 mmol) was added dropwise over 30 minutes. The reaction mixture was stirred at rt for 1 hour. The mixture was analysed by taking a sample ( $\sim 10$   $\mu\text{L}$ ), diluting with 2-MeTHF and obtaining a  $^1\text{H}$  NMR spectrum. The reaction was incomplete therefore stirring was continued and a further sample taken after 4 hours. The reaction was not worked-up.

### 1-Fluoro-4-propylbenzene

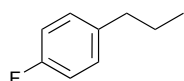

Table S-1, Entry 11: Following **General Procedure 1**, 4-bromofluorobenzene (110  $\mu\text{L}$ , 1.0 mmol) and  $[\text{PdCl}_2(\text{S})\text{-Xyl-Phanephos}]$  (8.7 mg, 0.01 mmol) were dissolved in 2-MeTHF (1.0 mL) and *n*-propylmagnesium chloride solution (600  $\mu\text{L}$ , 2.0M in  $\text{Et}_2\text{O}$ ,

1.2 mmol) was added dropwise over 30 minutes. The reaction mixture was stirred at rt for 24 hours. The mixture was analysed by taking a sample (~10  $\mu\text{L}$ ), diluting with  $\text{CDCl}_3$  and obtaining a  $^1\text{H}$  NMR spectrum. Aqueous HCl (5 mL, 1M) was added and the aqueous phase extracted with EtOAc ( $3 \times 10$  mL). The combined organics were dried over  $\text{Na}_2\text{SO}_4$  and concentrated under reduced pressure. The resulting oil was purified by column chromatography on silica gel (eluent  $\text{CH}_2\text{Cl}_2$ :hexane 70:30) to give 1-fluoro-4-propylbenzene as a pale yellow oil (102.7 mg, 74%);  $\nu_{\text{max}}$  (thin film) 2959, 2928, 1508, 1499, 1223, 824;  $\delta_{\text{H}}$  (500 MHz,  $\text{CDCl}_3$ ) 7.16-7.10 (2H, m), 7.00-6.94 (2H, m), 2.57 (2H, t,  $J$  7.6), 1.68-1.59 (2H, m), 0.94 (3H, t,  $J$  7.4);  $\delta_{\text{F}}$  (470 MHz,  $\text{CDCl}_3$ ) -118.2;  $\delta_{\text{C}}$  (125 MHz,  $\text{CDCl}_3$ ) 161.3 (d,  $J$  243.0), 138.3 (d,  $J$  3.18), 129.8 (d,  $J$  7.57), 115.0 (d,  $J$  20.9), 37.3, 24.8, 13.8;  $m/z$  HRMS ( $\text{EI}^+$ )  $\text{C}_9\text{H}_{11}\text{F}^+$  ( $[\text{M}]^+$ ) requires 138.0845; found 138.0840 (-3.5 ppm).

Table S-1, Entry 12: Following **General Procedure 1**, 4-bromoanisole (126  $\mu\text{L}$ , 1.0 mmol) and 1-methylnaphthalene (120  $\mu\text{L}$ , 1.0 mmol) were dissolved in 2-MeTHF (1.0 mL) and ~10  $\mu\text{L}$  of the solution was diluted in  $\text{CDCl}_3$  and analysed using  $^1\text{H}$  NMR (to give a  $t_0$  spectra). The remainder of this solution was added to second Schlenk flask containing  $[\text{PdCl}_2(\text{dppf})]$  (7.3 mg, 0.01 mmol). *para*-Tolylmagnesium bromide solution (2.4 mL, 0.5M in  $\text{Et}_2\text{O}$ , 1.2 mmol) was added dropwise over 30 minutes. The reaction mixture was stirred at rt for 18 hours. The mixture was analysed by taking a sample (~10  $\mu\text{L}$ ), diluting with  $\text{CDCl}_3$  and obtaining a  $^1\text{H}$  NMR spectrum. The reaction was not worked-up.

Table S-1, Entry 13: Following **General Procedure 1**, 4-bromoanisole (126  $\mu\text{L}$ , 1.0 mmol) and 1-methylnaphthalene (120  $\mu\text{L}$ , 1.0 mmol) were dissolved in 2-MeTHF (1.0 mL) and ~10  $\mu\text{L}$  of the solution was diluted in  $\text{CDCl}_3$  and analysed using  $^1\text{H}$  NMR (to give a  $t_0$  spectra). The remainder of this solution was added to second Schlenk flask containing  $[\text{PdCl}_2(S)\text{-Xyl-Phanephos}]$  (8.7 mg, 0.01 mmol). *para*-Tolylmagnesium bromide solution (2.4 mL, 0.5M in  $\text{Et}_2\text{O}$ , 1.2 mmol) was added dropwise over 30 minutes. The reaction mixture was stirred at rt for 18 hours. The mixture was analysed by taking a sample (~10  $\mu\text{L}$ ), diluting with  $\text{CDCl}_3$  and obtaining a  $^1\text{H}$  NMR spectrum. The reaction was not worked-up.

Table S-1, Entry 14: Following **General Procedure 1**, 4-bromoanisole (63  $\mu\text{L}$ , 0.5 mmol) and 1-methylnaphthalene (60  $\mu\text{L}$ , 0.5 mmol) were dissolved in 2-MeTHF (500  $\mu\text{L}$ ) and  $\sim 10$   $\mu\text{L}$  of the solution was diluted in  $\text{CDCl}_3$  and analysed using  $^1\text{H}$  NMR (to give a  $t_0$  spectra). The remainder of this solution was added to second Schlenk flask containing  $[\text{PdCl}_2(\text{dppf})]$  (3.7 mg, 0.005 mmol). *para*-Tolylmagnesium bromide solution (1.2 mL, 0.5M in  $\text{Et}_2\text{O}$ , 0.6 mmol) was added dropwise over 30 minutes. The reaction mixture was stirred at 40  $^\circ\text{C}$  for 1 hour. The mixture was analysed by taking a sample ( $\sim 10$   $\mu\text{L}$ ), diluting with  $\text{CDCl}_3$  and obtaining a  $^1\text{H}$  NMR spectrum. The reaction was incomplete therefore stirring at 40  $^\circ\text{C}$  was continued and further samples taken after 4 and 22 hours. The reaction was not worked-up.

Table S-1, Entry 15: Following **General Procedure 1**, 4-bromoanisole (63  $\mu\text{L}$ , 0.5 mmol) and 1-methylnaphthalene (60  $\mu\text{L}$ , 0.5 mmol) were dissolved in 2-MeTHF (500  $\mu\text{L}$ ) and  $\sim 10$   $\mu\text{L}$  of the solution was diluted in  $\text{CDCl}_3$  and analysed using  $^1\text{H}$  NMR (to give a  $t_0$  spectra). The remainder of this solution was added to second Schlenk flask containing  $[\text{PdCl}_2(S)\text{-Xyl-Phanephos}]$  (4.3 mg, 0.005 mmol). *para*-Tolylmagnesium bromide solution (1.2 mL, 0.5M in  $\text{Et}_2\text{O}$ , 0.6 mmol) was added dropwise over 30 minutes. The reaction mixture was stirred at 40  $^\circ\text{C}$  for 1 hour. The mixture was analysed by taking a sample ( $\sim 10$   $\mu\text{L}$ ), diluting with  $\text{CDCl}_3$  and obtaining a  $^1\text{H}$  NMR spectrum. The reaction was incomplete therefore stirring at 40  $^\circ\text{C}$  was continued and further samples taken after 4 and 22 hours. The reaction was not worked-up.

#### 4-Methoxy-4'-methyl-1,1'-biphenyl

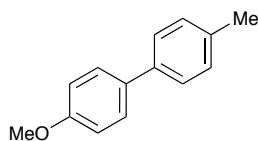

Table S-1, Entry 16: Following **General Procedure 1**, 4-bromoanisole (126  $\mu\text{L}$ , 1.0 mmol) and  $[\text{PdCl}_2(S)\text{-Xyl-Phanephos}]$  (8.7 mg, 0.01 mmol) were dissolved in 2-MeTHF (1.0 mL) and *para*-tolylmagnesium bromide solution (2.4 mL, 0.5M in  $\text{Et}_2\text{O}$ , 1.2 mmol) was added dropwise over 30 minutes. The reaction mixture was stirred at 40  $^\circ\text{C}$  for 22 hours. Aqueous HCl (5 mL, 1M) was added and the aqueous phase extracted with  $\text{Et}_2\text{O}$  ( $3 \times 10$  mL). The combined organics were dried over  $\text{Na}_2\text{SO}_4$  and concentrated under reduced pressure. The resulting oil was purified by column



chromatography on silica gel (eluent CH<sub>2</sub>Cl<sub>2</sub>:hexane 5:95) to give 4-methoxy-4'-methyl-1,1'-biphenyl as a white solid (173.5 mg, 88%) with spectroscopic data in accordance with the literature;<sup>5</sup>  $\delta_{\text{H}}$  (500 MHz, CDCl<sub>3</sub>) 7.56-7.52 (2H, m), 7.48 (2H, d, *J* 8.2), 7.26 (2H, d, *J* 8.0), 7.02-6.98 (2H, m), 3.87 (3H, s), 2.42 (3H, s);  $\delta_{\text{C}}$  (125 MHz, CDCl<sub>3</sub>) 159.0, 138.1, 136.5, 133.9, 129.6, 128.1, 126.7, 114.3, 55.5, 21.2; *m/z* HRMS (EI<sup>+</sup>) C<sub>14</sub>H<sub>14</sub>O<sup>+</sup> ([M]<sup>+</sup>) requires 198.1045; found 198.1043 (-0.8 ppm).

## Experimental details for the nitromethylation of 2-methoxyphenyl-1*H*-imidazole-1-sulfonate, **1**

**General procedure:** To an oven dried microwave vial was added (2-methoxyphenyl-1*H*-imidazole-1-sulfonate (127 mg, 0.50 mmol), palladium precatalyst, ligand, base (0.55 mmol) and powdered 3Å molecular sieves (100 mg). The vial was sealed with a crimp cap and flushed with argon for 5 minutes. Degassed nitromethane (5 mL) was added and the vial placed in an oil bath at 50 °C. The reaction was stirred vigorously for the required period of time. Upon cooling to rt, approximately 1 mL of the crude reaction mixture was added to an NMR tube complete with a C<sub>6</sub>D<sub>6</sub> capillary and a <sup>1</sup>H NMR was run to assess the ratio between 2-methoxyphenyl-1*H*-imidazole-1-sulfonate **1** and 1-methoxy-2-(nitromethyl)benzene **3**.

Table S-2, Entry **18**: 1-methoxy-2-(nitromethyl)benzene. To a flame dried Schlenk flask under a flow of argon was added (2-methoxyphenyl-1*H*-imidazole-1-sulfonate (635 mg, 2.50 mmol), Pd<sub>2</sub>dba<sub>3</sub> (114.7 mg, 0.125 mmol), TrixiePhos (120 mg, 0.300 mmol), Cs<sub>2</sub>CO<sub>3</sub> (896 mg, 2.75 mmol) and powdered 3Å molecular sieves (500 mg). The Schlenk flask was sealed with a rubber septum. Degassed nitromethane (25 mL) was added and the flask placed in an oil bath at 50 °C. The reaction was stirred vigorously for 64 h. Upon cooling to rt, CH<sub>2</sub>Cl<sub>2</sub> (50 mL) was added and the organics washed with sat. aqueous NH<sub>4</sub>Cl (2 × 50 mL). The combined aqueous solutions were extracted with CH<sub>2</sub>Cl<sub>2</sub> (2 × 50 mL). The combined organics were washed with brine (50 mL), dried over Na<sub>2</sub>SO<sub>4</sub>, filtered and concentrated *in vacuo* to give the crude product. Purification *via* column chromatography on silica gel (eluent petrol:EtOAc 98:2 to 95:5) gave 1-methoxy-2-(nitromethyl)benzene (271 mg, 65%) as a white solid with spectroscopic data in accordance with the literature;<sup>6</sup> mp 59-61 °C {lit.<sup>7</sup> 64-65 °C}; δ<sub>H</sub> (300 MHz, CDCl<sub>3</sub>) 7.44-7.38 (1H m), 7.31-7.26 (1H, m), 7.02-6.95 (1H, m), 6.95 (1H, m), 5.46 (2H, s), 3.83 (3H, s); δ<sub>C</sub> (75 MHz, CDCl<sub>3</sub>) 158.6, 132.5, 132.2, 121.1, 118.9, 111.3, 75.1, 56.0; *m/z* HRMS (EI<sup>+</sup>) C<sub>8</sub>H<sub>9</sub>O<sub>3</sub>N<sup>+</sup> ([M]<sup>+</sup>) requires 167.0582; found 167.0586 (+2.1 ppm).

## Experimental details for the cyanation of 2-methoxyphenyl-1*H*-imidazole-1-sulfonate, **1**

**General procedure:** To a microwave vial was added (2-methoxyphenyl-1*H*-imidazole-1-sulfonate (203 mg, 0.80 mmol),  $\text{K}_4\text{Fe}(\text{CN})_6 \cdot 3\text{H}_2\text{O}$ ,  $\text{K}_2\text{CO}_3$  (111 mg, 0.80 mmol), and the requisite metal precatalyst and ligand. The vial was sealed with a crimp cap and flushed with argon for 5 minutes. The selected solvent degassed by vigorous bubbling with argon before being added (4 mL) to the vial. The vial was then placed in an oil bath at the requisite temperature stirred vigorously for the required period of time. Upon cooling to rt,  $\text{CH}_2\text{Cl}_2$  (4 mL) was added to the crude reaction mixture and the solution stirred vigorously before being allowed to settle. Approximately 1 mL of the  $\text{CH}_2\text{Cl}_2$  layer was added to an NMR tube complete with a  $\text{C}_6\text{D}_6$  capillary and a  $^1\text{H}$  NMR was run to assess the ratio between **5**, **1** and **6**.

Table S-4, Entry **5**: 2-methoxybenzonitrile. To a microwave vial was added (2-methoxyphenyl-1*H*-imidazole-1-sulfonate (203 mg, 0.80 mmol),  $\text{K}_4\text{Fe}(\text{CN})_6 \cdot 3\text{H}_2\text{O}$  (71.0 mg, 0.168 mmol),  $\text{Pd}(\text{TFA})_2$  (2.7 mg, 0.008 mmol),  $\text{PPh}_3$  (6.3 mg, 0.024 mmol) and  $\text{K}_2\text{CO}_3$  (111 mg, 0.800 mmol). The crimp cap was attached and the vial purged with argon for 5 minutes. A degassed solution of 50:50 (v:v)  $\text{H}_2\text{O}$ :*t*-BuOH (4 mL) was added and the vial placed in an oil bath at 90 °C and the reaction was stirred vigorously for 48 h. Upon cooling to rt, water (35 mL) was added and the aqueous phase was extracted with  $\text{CH}_2\text{Cl}_2$  (3 × 50 mL) and EtOAc (50 mL). The combined organics were dried over  $\text{Na}_2\text{SO}_4$ , filtered and concentrated *in vacuo* to give the crude product. Purification *via* column chromatography on silica gel (eluent petrol:Et<sub>2</sub>O 95:5 to 90:10) gave 2-methoxybenzonitrile (271 mg, 71%) as a colourless oil with spectroscopic data in accordance with the literature;<sup>8</sup>  $\delta_{\text{H}}$  (300 MHz,  $\text{CDCl}_3$ ) 7.56-7.5- (2H, m), 7.07-7.00 (2H, m), 3.92 (3H, s);  $\delta_{\text{C}}$  (75 MHz,  $\text{CDCl}_3$ ) 161.3, 134.5, 133.8, 120.8, 116.6, 111.4, 101.9, 56.1; *m/z* HRMS (ESI<sup>+</sup>)  $\text{C}_8\text{H}_7\text{ONNa}^+$  ( $[\text{M}+\text{Na}]^+$ ) requires 156.0425; found 156.0414 (−0.6 ppm).

## Experimental details for the Meyers reactions on 2-(2-methoxyphenyl)benzo[d]oxazole, 4

### 2-(4'-Methyl-[1,1'-biphenyl]-2-yl)benzo[d]oxazole, 7a

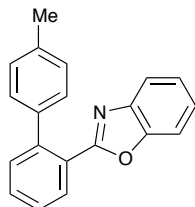

To a solution of 2-(2-methoxyphenyl)benzo[d]oxazole (50.0 mg, 0.222 mmol) in anhydrous 2-MeTHF at 40 °C was added a solution of 4-methylphenylmagnesium bromide (0.93 mL, 0.5M in Et<sub>2</sub>O, 0.466 mmol) and the resultant mixture stirred for 16 h. Upon cooling to rt, the solution was concentrated *in vacuo* before water (25 mL) was added. The aqueous phase was extracted with CH<sub>2</sub>Cl<sub>2</sub> (3 × 25 mL) and EtOAc (25 mL). The combined organics were dried over MgSO<sub>4</sub>, filtered and concentrated *in vacuo* to give the crude product. Purification *via* column chromatography on silica gel (eluent petrol:EtOAc 96:4) gave 2-(4'-methyl-[1,1'-biphenyl]-2-yl)benzo[d]oxazole (61.1 mg, 96%) as a white solid with spectroscopic data in accordance with the literature;<sup>9</sup> mp 83-85 °C {lit.<sup>9</sup> 88-90 °C};  $\nu_{\max}$  (ATR) 2920, 1474, 1450, 1244, 1234, 1022, 742;  $\delta_{\text{H}}$  (300 MHz, CDCl<sub>3</sub>) 8.12-8.06 (1H, m), 7.77-7.71 (1H, m), 7.62-7.54 (1H, m), 7.53-7.45 (2H, m), 7.35-7.23 (3H, m), 7.22-7.10 (4H, m), 2.37 (3H, s);  $\delta_{\text{C}}$  (75 MHz, CDCl<sub>3</sub>) 164.2, 150.9, 142.5, 141.8, 138.1, 137.1, 131.3, 131.2, 131.1, 129.0, 128.8, 127.4, 126.4, 125.0, 124.4, 120.2, 110.7, 21.3; *m/z* HRMS (ESI<sup>+</sup>) C<sub>20</sub>H<sub>15</sub>ONNa<sup>+</sup> ([M+Na]<sup>+</sup>) requires 308.1051; found 308.1039 (-2.2 ppm).

### 2-(4'-Fluoro-[1,1'-biphenyl]-2-yl)benzo[d]oxazole, 7b

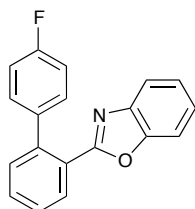

To a solution of 2-(2-methoxyphenyl)benzo[d]oxazole (50.0 mg, 0.222 mmol) in *tert*-amyl methyl ether at rt was added a solution of 4-fluorophenylmagnesium bromide (0.71 mL, 1.0M in THF, 0.713 mmol) and the resultant mixture placed in an oil bath at 110 °C and stirred for 16 h. Upon cooling to rt, the solution was concentrated *in*

*vacuo* before water (25 mL) was added. The aqueous phase was extracted with CH<sub>2</sub>Cl<sub>2</sub> (3 × 25 mL) and EtOAc (25 mL). The combined organics were dried over MgSO<sub>4</sub>, filtered and concentrated *in vacuo* to give the crude product. Purification *via* column chromatography on silica gel (eluent petrol:Et<sub>2</sub>O 95:5) gave 2-(4'-fluoro-[1,1'-biphenyl]-2-yl)benzo[*d*]oxazole (50.1 mg, 78%) as a viscous oil;  $\nu_{\max}$  (thin film) 3059, 1605, 1508, 1473, 1450, 1221, 1029, 754;  $\delta_{\text{H}}$  (300 MHz, CDCl<sub>3</sub>) 8.19-8.12 (1H, m), 7.78-7.71 (1H, m), 7.66-7.45 (3H, m), 7.38-7.24 (5H, m), 7.09-7.01 (2H, m);  $\delta_{\text{F}}$  (282 MHz, CDCl<sub>3</sub>) -115.79;  $\delta_{\text{C}}$  (75 MHz, CDCl<sub>3</sub>) 163.7, 162.4 (d, *J* 246.3), 150.8, 141.7, 141.5, 137.1 (d, *J* 3.3), 131.2, 131.1 (d, *J* 3.3), 130.6, 130.5, 127.8, 126.4, 125.2, 124.5, 120.2, 115.2 (d, *J*, 21.5), 110.7; *m/z* HRMS (ESI<sup>+</sup>) C<sub>19</sub>H<sub>12</sub>ONFNa<sup>+</sup> ([M+Na]<sup>+</sup>) requires 312.0801; found 312.0788 (-2.3 ppm).

### 2-(2-(Thiophen-2-yl)phenyl)benzo[*d*]oxazole, 7c

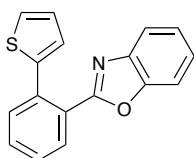

To a solution of 2-(2-methoxyphenyl)benzo[*d*]oxazole (50.0 mg, 0.222 mmol) in *tert*-amyl methyl ether at rt was added a solution of 2-thienylmagnesium bromide (0.71 mL, 1.0M in THF, 0.713 mmol) and the resultant mixture placed in an oil bath at 110 °C and stirred for 16 h. Upon cooling to rt, the solution was concentrated *in vacuo* before water (25 mL) was added. The aqueous phase was extracted with CH<sub>2</sub>Cl<sub>2</sub> (3 × 25 mL) and EtOAc (25 mL). The combined organics were dried over MgSO<sub>4</sub>, filtered and concentrated *in vacuo* to give the crude product. Purification *via* column chromatography on silica gel (eluent petrol:Et<sub>2</sub>O 95:5) gave 2-(2-(thiophen-2-yl)phenyl)benzo[*d*]oxazole (51.7 mg, 84%) as a brown solid; mp 71-73 °C;  $\nu_{\max}$  (ATR) 3062, 2922, 1558, 1452, 1423, 1244, 1232, 1024, 708;  $\delta_{\text{H}}$  (300 MHz, CDCl<sub>3</sub>) 7.93 (1H, dd, *J* 7.6, 1.1), 7.76-7.68 (1H, m), 7.58-7.38 (3H, m), 7.36-7.18 (4H, m), 6.94-6.84 (2H, m);  $\delta_{\text{C}}$  (75 MHz, CDCl<sub>3</sub>) 163.4, 150.9, 141.9, 141.8, 135.0, 131.4, 131.3, 131.1, 128.0, 127.4, 126.9, 126.9, 126.2, 125.2, 124.5, 120.3, 110.8; *m/z* HRMS (ESI<sup>+</sup>) C<sub>17</sub>H<sub>12</sub>ONS<sup>+</sup> ([M+H]<sup>+</sup>) requires 278.0640; found 278.0624 (-3.6 ppm).

### 2-(2-Propylphenyl)benzo[*d*]oxazole, 7d

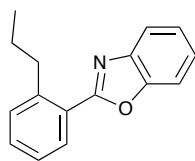

To a solution of 2-(2-methoxyphenyl)benzo[*d*]oxazole (50.0 mg, 0.222 mmol) in anhydrous 2-MeTHF at 80 °C was added a solution of *n*-propylmagnesium chloride (0.37 mL, 2.0M in THF, 0.732 mmol) and the resultant mixture stirred for 16 h. Upon cooling to rt, the solution was concentrated *in vacuo* before water (25 mL) was added. The aqueous phase was extracted with CH<sub>2</sub>Cl<sub>2</sub> (3 × 25 mL) and EtOAc (25 mL). The combined organics were dried over MgSO<sub>4</sub>, filtered and concentrated *in vacuo* to give the crude product. Purification *via* column chromatography on silica gel (eluent petrol:EtOAc 96:4) gave 2-(2-propylphenyl)benzo[*d*]oxazole (28.0 mg, 53%) as an off white solid; mp 77-79 °C;  $\nu_{\max}$  (ATR) 2959, 1454, 1379, 1273, 1161, 1107, 1068, 1030, 744;  $\delta_{\text{H}}$  (300 MHz, CDCl<sub>3</sub>) 8.16-8.11 (1H, m), 7.84-7.77 (1H, m), 7.63-7.56 (1H, m), 7.48-7.41 (1H, m), 7.40-7.31 (4H, m), 3.22-3.15 (2H, m), 1.76-1.62 (2H, m), 1.00 (3H, t, *J* 7.3);  $\delta_{\text{C}}$  (75 MHz, CDCl<sub>3</sub>) 163.5, 150.5, 143.6, 142.3, 131.1, 131.0, 130.5, 126.2, 126.1, 125.1, 124.4, 120.3, 110.6, 36.5, 24.7, 14.2; *m/z* HRMS (ESI<sup>+</sup>) C<sub>16</sub>H<sub>16</sub>ON<sup>+</sup> ([M+H]<sup>+</sup>) requires 238.1232; found 238.1222 (-1.9 ppm).

### 2-(2-Vinylphenyl)benzo[*d*]oxazole, 7e

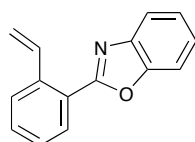

To a solution of 2-(2-methoxyphenyl)benzo[*d*]oxazole (50.0 mg, 0.222 mmol) in anhydrous 2-MeTHF (1 mL) at 20 °C was added a solution of vinylmagnesium chloride (0.29 mL, 1.6M in THF, 0.466 mmol) and the resultant mixture stirred for 4 h. The solution was concentrated *in vacuo* before aqueous saturated ammonium chloride solution (5 mL) was added. The aqueous phase was extracted with EtOAc (3 x 5 mL). The combined organics were dried over NaSO<sub>4</sub>, filtered and concentrated *in vacuo* to give the crude product. Purification *via* column chromatography on Et<sub>3</sub>N deactivated silica gel (eluent Et<sub>3</sub>N:hexane:EtOAc 1:95:5) gave 2-(2-vinylphenyl)benzo[*d*]oxazole (36.8 mg, 75%) as an off white solid; mp 53-55 °C;  $\nu_{\max}$  (ATR) 3028, 2920, 1545, 1454, 1236, 1030, 918;  $\delta_{\text{H}}$  (500 MHz, CDCl<sub>3</sub>) 8.15 (1H, dd,

*J* 7.8, 1.1), 7.86-7.79 (2H, m), 7.75-7.71 (1H, m), 7.63-7.58 (1H, m), 7.53-7.49 (1H, m), 7.43 (1H, td, *J* 7.7, 1.1), 7.39-7.35 (2H, m), 5.82 (1H, dd, *J* 17.4, 1.0), 5.48 (1H, dd, *J* 11.0, 1.0);  $\delta_{\text{C}}$  (125 MHz, CDCl<sub>3</sub>) 162.8, 150.5, 142.2, 138.4, 135.9, 131.2, 130.1, 127.9, 127.3, 125.3, 125.1, 124.6, 120.4, 116.9, 110.7; *m/z* HRMS (ESI<sup>+</sup>) C<sub>15</sub>H<sub>12</sub>ON<sup>+</sup> ([M+H]<sup>+</sup>) requires 222.0919; found 222.0917 (−1.5 ppm).

### 2-([1,1'-Biphenyl]-2-yl)benzo[d]oxazole, 7f

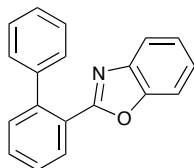

To a solution of 2-(2-methoxyphenyl)benzo[d]oxazole (50.0 mg, 0.222 mmol) in anhydrous 2-MeTHF at 40 °C was added a solution of phenylmagnesium bromide (0.25 mL, 3.0M in Et<sub>2</sub>O, 0.733 mmol) and the resultant mixture stirred for 48 h. Upon cooling to rt, the solution was concentrated *in vacuo* before water (25 mL) was added. The aqueous phase was extracted with CH<sub>2</sub>Cl<sub>2</sub> (3 × 25 mL) and EtOAc (25 mL). The combined organics were dried over MgSO<sub>4</sub>, filtered and concentrated *in vacuo* to give the crude product. Purification *via* column chromatography on silica gel (eluent petrol:Et<sub>2</sub>O 95:5) gave 2-([1,1'-biphenyl]-2-yl)benzo[d]oxazole (57.2 mg, 95%) as a colourless sticky oil with spectroscopic data in accordance with the literature;<sup>10</sup>  $\nu_{\text{max}}$  (thin film) 2912, 1451, 1240, 1026, 738, 696;  $\delta_{\text{H}}$  (400 MHz, CDCl<sub>3</sub>) 8.14-8.10 (1H, m), 7.72 (1H, dt, *J* 7.6, 1.1), 7.63-7.60 (1H, m), 7.55-7.47 (2H, m), 7.36-7.24 (8H, m);  $\delta_{\text{C}}$  (100 MHz, CDCl<sub>3</sub>) 164.0, 150.8, 142.6, 141.8, 141.1, 131.3, 131.1 (2 × C), 128.9, 128.2, 127.7, 127.4, 126.4, 125.0, 124.4, 120.2, 110.7; *m/z* HRMS (ESI<sup>+</sup>) C<sub>19</sub>H<sub>14</sub>ON<sup>+</sup> ([M+H]<sup>+</sup>) requires 272.1075; found 272.1067 (−1.1 ppm).

### 2-(4'-Methoxy-[1,1'-biphenyl]-2-yl)benzo[d]oxazole, 7g

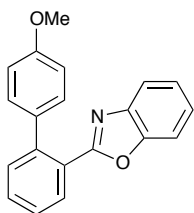

To a solution of 2-(2-methoxyphenyl)benzo[d]oxazole (50.0 mg, 0.222 mmol) in anhydrous 2-MeTHF at 40 °C was added a solution of 4-methoxyphenylmagnesium

bromide (1.86 mL, 0.5M in THF, 0.932 mmol) and the resultant mixture stirred for 48 h. Upon cooling to rt, the solution was concentrated *in vacuo* before water (25 mL) was added. The aqueous phase was extracted with CH<sub>2</sub>Cl<sub>2</sub> (3 × 25 mL) and EtOAc (25 mL). The combined organics were dried over MgSO<sub>4</sub>, filtered and concentrated *in vacuo* to give the crude product. Purification *via* column chromatography on silica gel (eluent petrol:Et<sub>2</sub>O 90:10) gave 2-(4'-methoxy-[1,1'-biphenyl]-2-yl)benzo[*d*]oxazole (32.0 mg, 48%) as a white solid; mp 105-106 °C;  $\nu_{\max}$  (ATR) 2938, 1610, 1508, 1456, 1435, 1229, 1177, 1016, 746;  $\delta_{\text{H}}$  (300 MHz, CDCl<sub>3</sub>) 8.09-8.06 (1H, m), 7.75-7.71 (1H, m), 7.60-7.54 (1H, m), 7.50-7.45 (2H, m), 7.35-7.19 (5H, m) 6.89-6.84 (2H, m), 3.83 (3H, s);  $\delta_{\text{C}}$  (100 MHz, CDCl<sub>3</sub>) 164.2, 159.1, 150.9, 142.2, 141.8, 133.4, 131.2, 131.2, 131.1, 130.0, 127.3, 126.3, 125.0, 124.4, 120.2, 113.7, 110.7 55.4; *m/z* HRMS (ESI<sup>+</sup>) C<sub>20</sub>H<sub>16</sub>O<sub>2</sub>N<sup>+</sup> ([M+H]<sup>+</sup>) requires 302.1181; found 302.1171 (−1.5 ppm).

### 2-(3',5'-bis(Trifluoromethyl)-[1,1'-biphenyl]-2-yl)benzo[*d*]oxazole, 7h

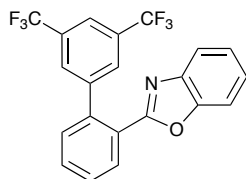

To a solution of 2-(2-methoxyphenyl)benzo[*d*]oxazole (50.0 mg, 0.222 mmol) in *tert*-amyl methyl ether at rt was added a solution of 3,5-bis(trifluoromethyl)phenylmagnesium bromide solution (0.93 mL, 0.5M in THF, 0.466 mmol) and the resultant mixture placed in an oil bath at 110 °C and stirred for 16 h. Upon cooling to rt, the solution was concentrated *in vacuo* before water (25 mL) was added. The aqueous phase was extracted with CH<sub>2</sub>Cl<sub>2</sub> (3 × 25 mL) and EtOAc (25 mL). The combined organics were dried over MgSO<sub>4</sub>, filtered and concentrated *in vacuo* to give the crude product. Purification *via* column chromatography on silica gel (eluent petrol:Et<sub>2</sub>O 95:5) gave 2-(3',5'-bis(trifluoromethyl)-[1,1'-biphenyl]-2-yl)benzo[*d*]oxazole (81.2 mg, 90%) as a white solid; mp 105-106 °C;  $\nu_{\max}$  (ATR) 2963, 1454, 1379, 1273, 1161, 1109, 1070, 898, 744;  $\delta_{\text{H}}$  (300 MHz, CDCl<sub>3</sub>) 8.33-8.27 (1H, m), 7.89 (1H, s), 7.81 (2H, s), 7.69-7.59 (3H, m), 7.40-7.44 (1H, m), 7.35-7.28 (3H, m);  $\delta_{\text{F}}$  (282 MHz, CDCl<sub>3</sub>) −63.32;  $\delta_{\text{C}}$  (100 MHz, CDCl<sub>3</sub>) 162.2, 150.6, 143.1, 141.5, 139.2, 131.4, 131.3, 131.2 (q, *J* 30.7), 130.8, 129.7 (d, *J* 2.2), 129.1, 126.1,



125.6, 124.8, 123.5 (q,  $J$  272.4), 121.2 (m), 120.4, 110.5;  $m/z$  HRMS (ESI<sup>+</sup>) C<sub>21</sub>H<sub>12</sub>ONF<sub>6</sub><sup>+</sup> ([M+H]<sup>+</sup>) requires 408.0823; found 408.0815 (−0.6 ppm).

## 6. References

---

- <sup>1</sup> J. Albanese-Walker, R. Raju, J. A. Vance, A. J. Goodman, M. R. Reeder, J. Liao, M. T. Maust, P. A. Irish, P. Espino and D. R. Andrews, *Org. Lett.*, 2009, **11**, 1463.
- <sup>2</sup> L. Ackermann, S. Barfusser and J. Pospech, *Org. Lett.*, 2010, **12**, 724.
- <sup>3</sup> Y. Yang, N. J. Oldenhuis and S. L. Buchwald, *Angew. Chem. Int. Ed.*, 2013, **52**, 615.
- <sup>4</sup> Z.-Y. Wang, G.-Q. Chen and L.-X. Shao, *J. Org. Chem.*, 2012, **77**, 6608.
- <sup>5</sup> Y. Zhou, W. You, K. B. Smith and M. Kevin Brown, *Angew. Chem. Int. Ed.*, 2014, **53**, 3475.
- <sup>6</sup> A. E. Metz and M. C. Kozlowski, *J. Org. Chem.*, 2013, **78**, 717.
- <sup>7</sup> F. M. Hauser and V. M. Baghdanov, *J. Org. Chem.*, 1988, **53**, 2872.
- <sup>8</sup> Z. Wang and S. Chang, *Org. Lett.*, 2013, **15**, 1990.
- <sup>9</sup> Y. Li, Y. Wu, F. Yang, J. Zhang and Z. Zhu, *Tetrahedron*, 2008, **64**, 6782.
- <sup>10</sup> H. Hachiya, K. Hirano, T. Satoh and M. Miura, *Org. Lett.*, 2009, **11**, 1737.

7. An example of a  $^1\text{H}$  NMR showing how conversion and yield were calculated in the Kumada Cross-coupling

**Figure 3:** An  $^1\text{H}$  NMR spectrum of a  $t_0$  showing the ratio between the doublet of 1-methylnaphthalene the internal standard at 7.99 ppm and the singlet of 2-methoxyphenyl-1*H*-imidazole-1-sulfonate the substrate at 3.61 ppm.

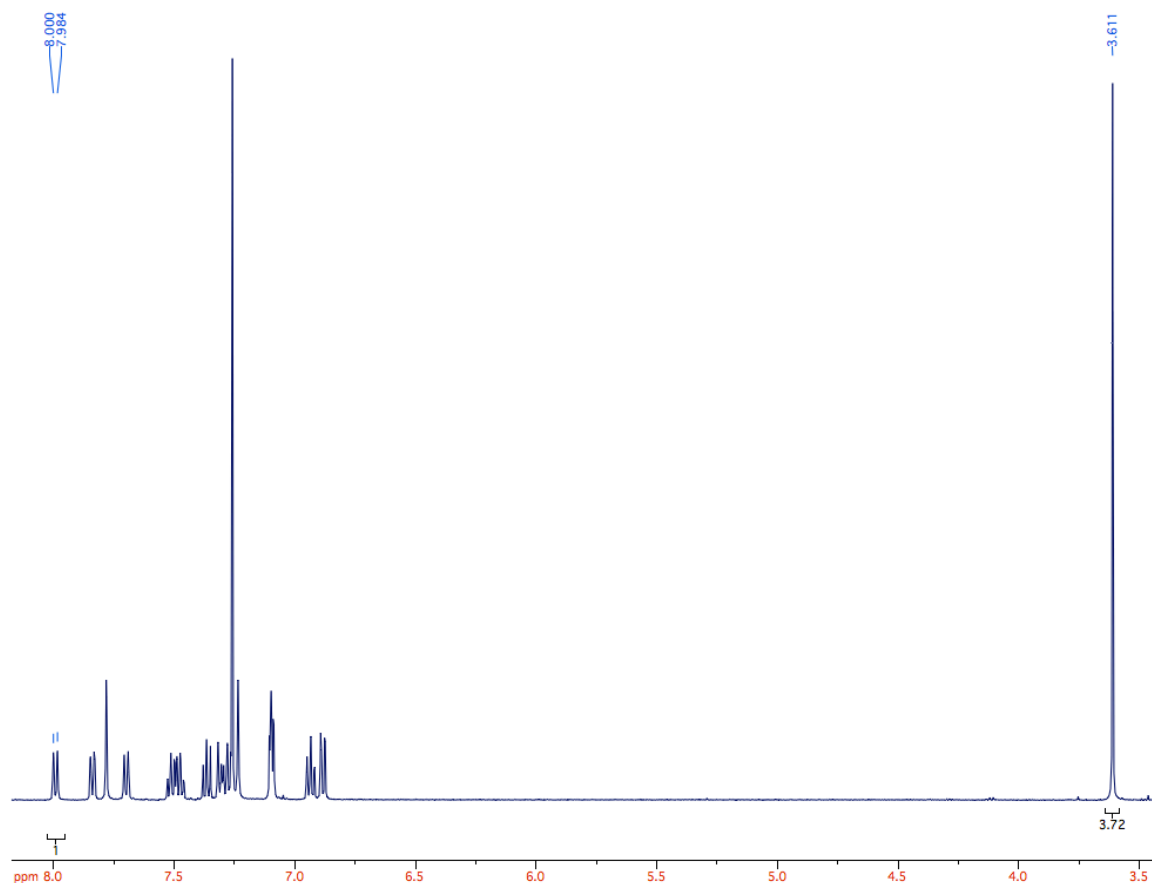

**Figure 4:** An  $^1\text{H}$  NMR spectrum of a reaction sample with excellent conversion showing the ratio between the doublet of 1-methylnaphthalene the internal standard at 7.99 ppm and the singlet of 2-methoxy-4'-methyl-1,1'-biphenyl the product at 3.79 ppm.

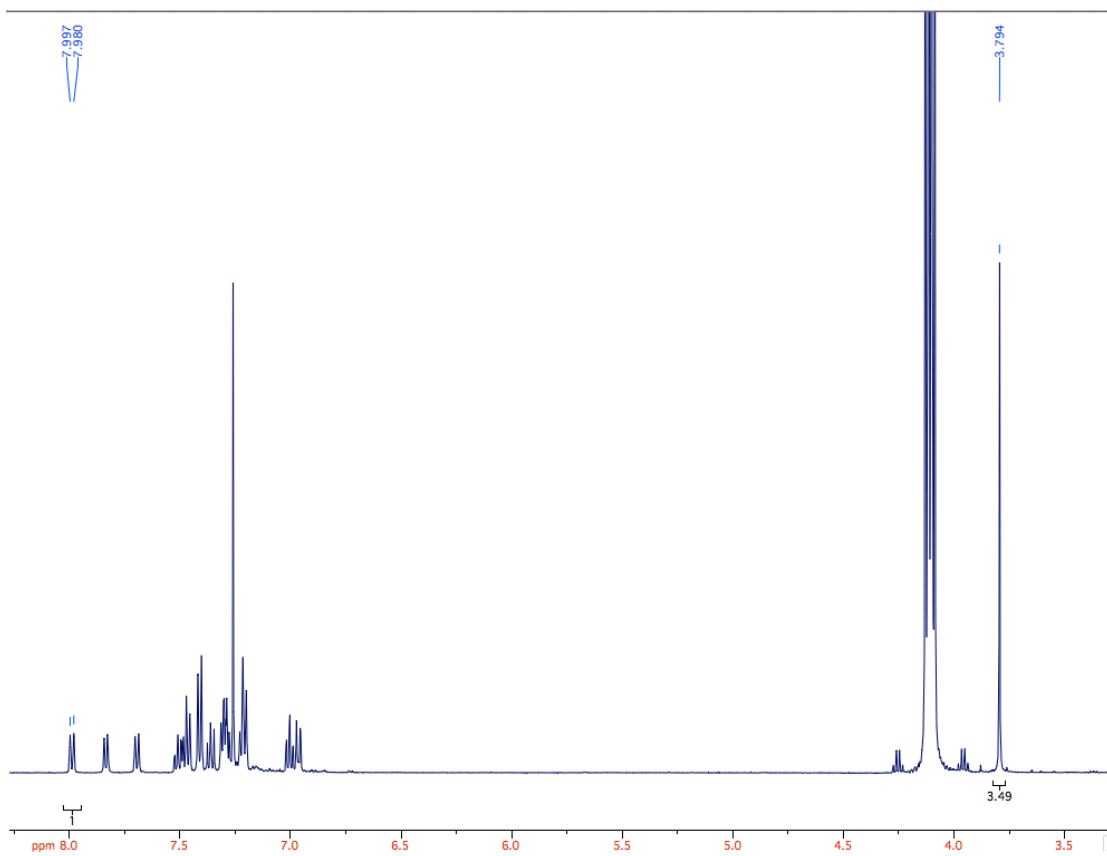

**Figure 5:** An  $^1\text{H}$  NMR spectrum of a reaction sample with poor conversion showing the ratio between the doublet of 1-methylnaphthalene the internal standard at 7.99 ppm, the singlet of 2-methoxy-4'-methyl-1,1'-biphenyl the product at 3.79 ppm and the singlet of 2-methoxyphenyl-1*H*-imidazole-1-sulfonate the substrate at 3.61 ppm.

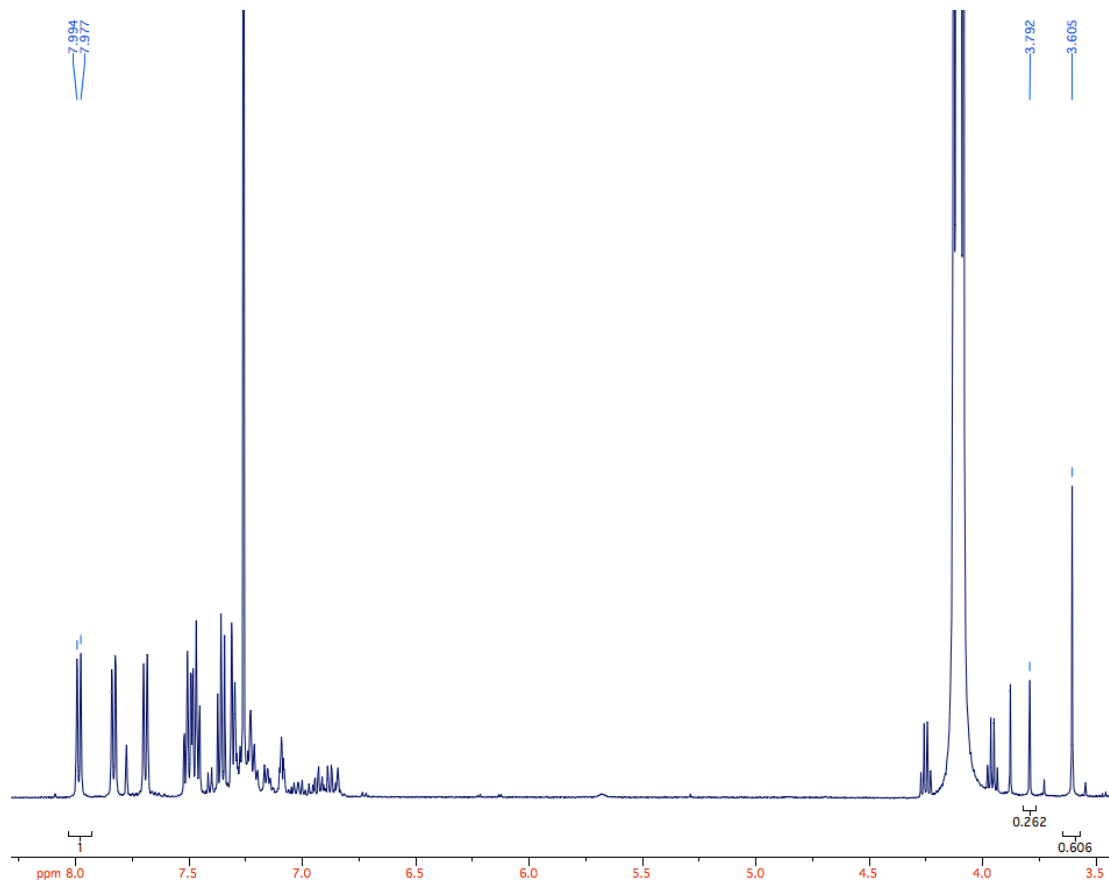

8. Copies of  $^1\text{H}$  and  $^{13}\text{C}$  NMR spectra of all products

$^1\text{H}$  NMR of 2-Methoxy-4'-methyl-1,1'-biphenyl, 2

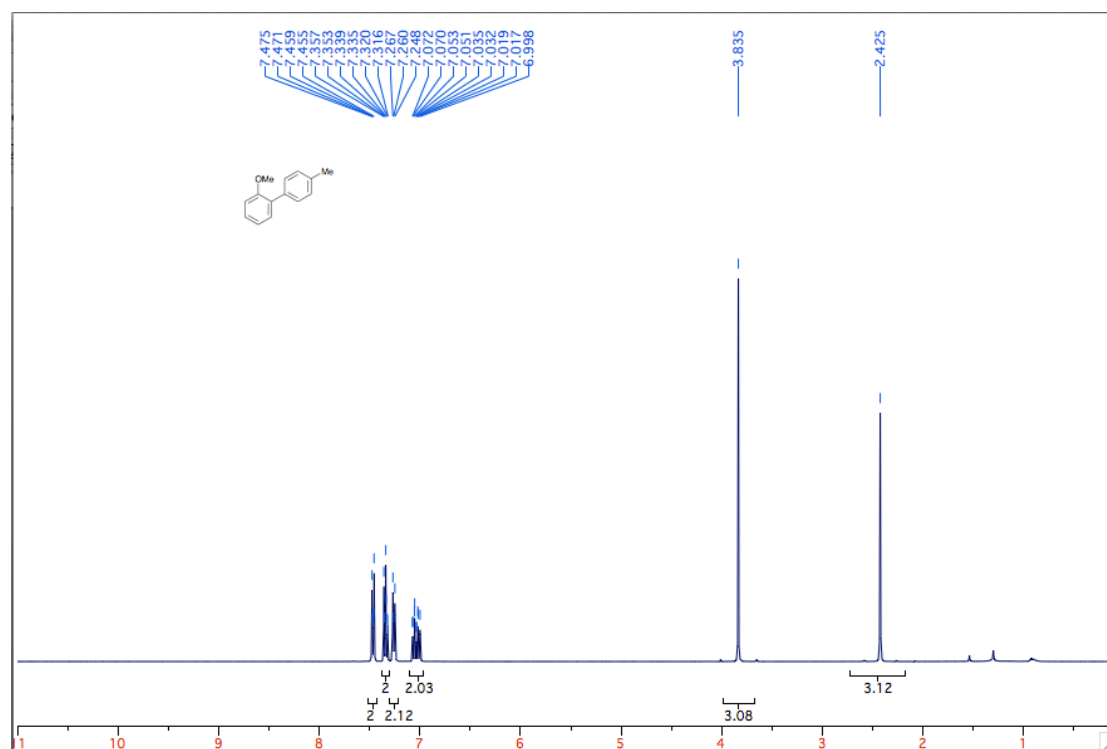

$^{13}\text{C}$  NMR of 2-Methoxy-4'-methyl-1,1'-biphenyl, 2

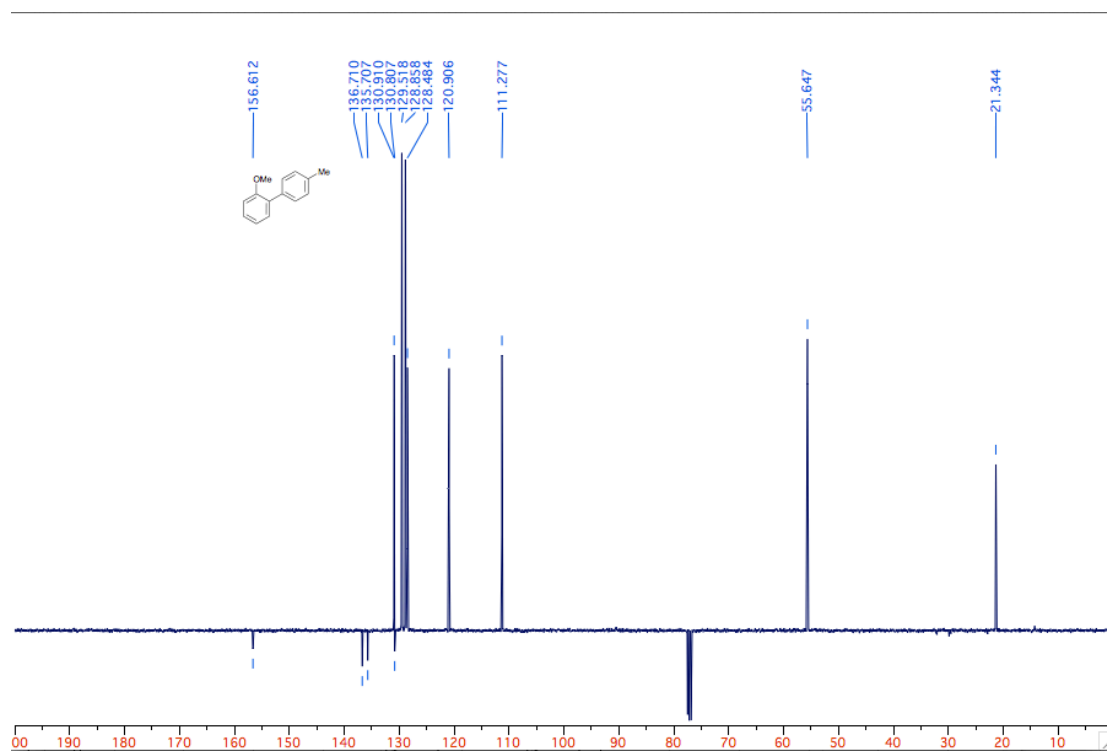

# <sup>1</sup>H NMR of 4-Fluoro-4'-methyl-1,1'-biphenyl

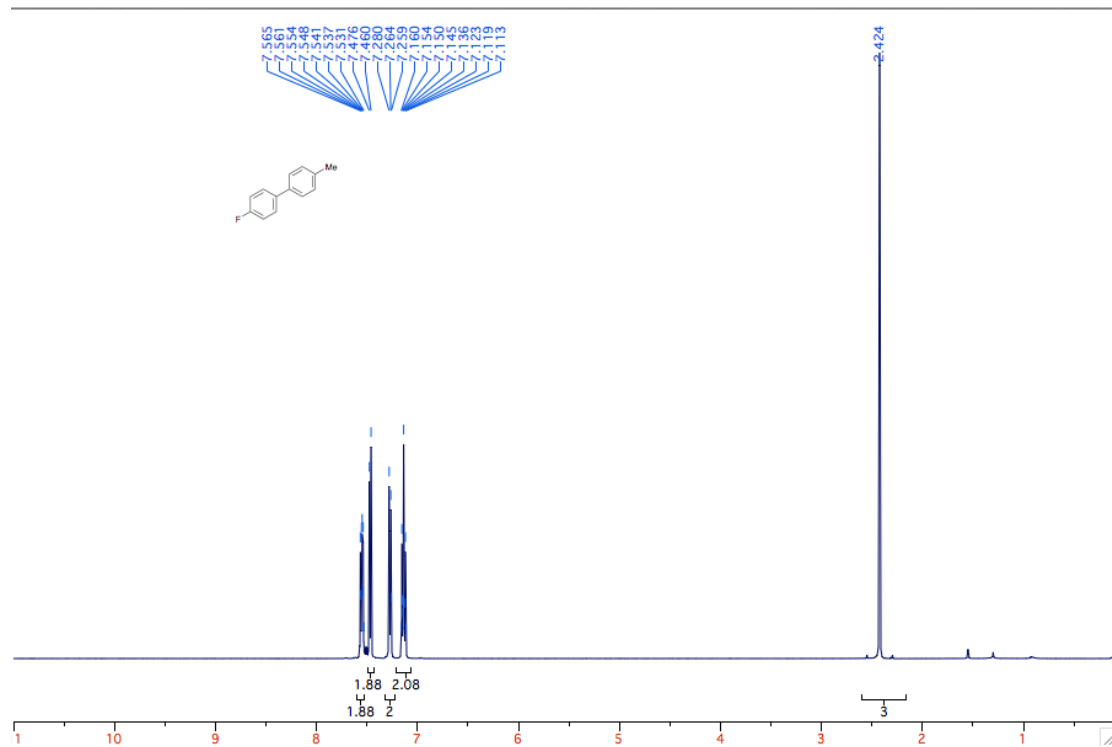

# <sup>13</sup>C NMR of 4-Fluoro-4'-methyl-1,1'-biphenyl

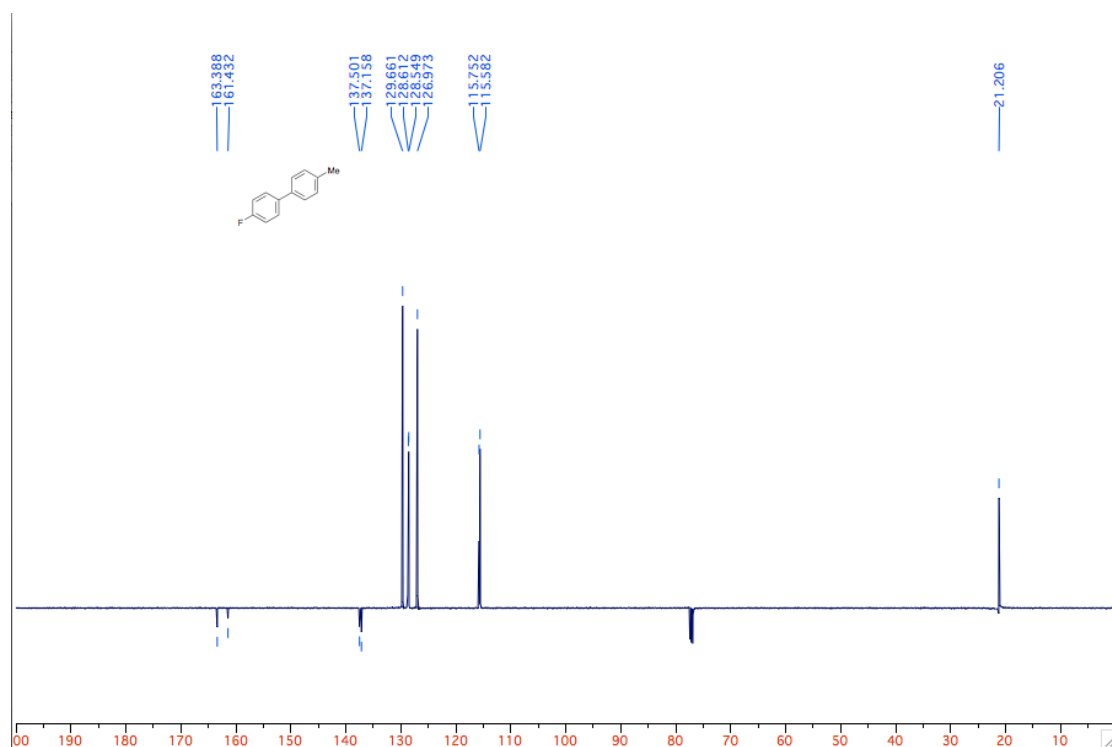

### <sup>1</sup>H NMR of 1-Fluoro-4-propylbenzene

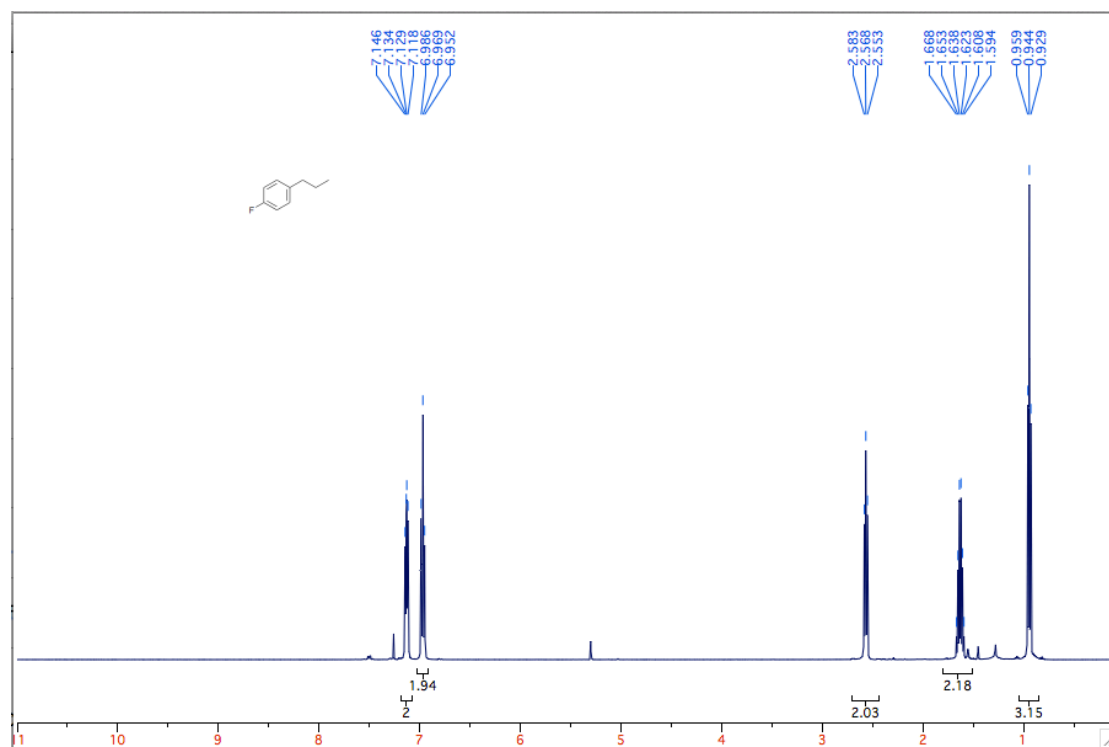

### <sup>13</sup>C NMR of 1-Fluoro-4-propylbenzene

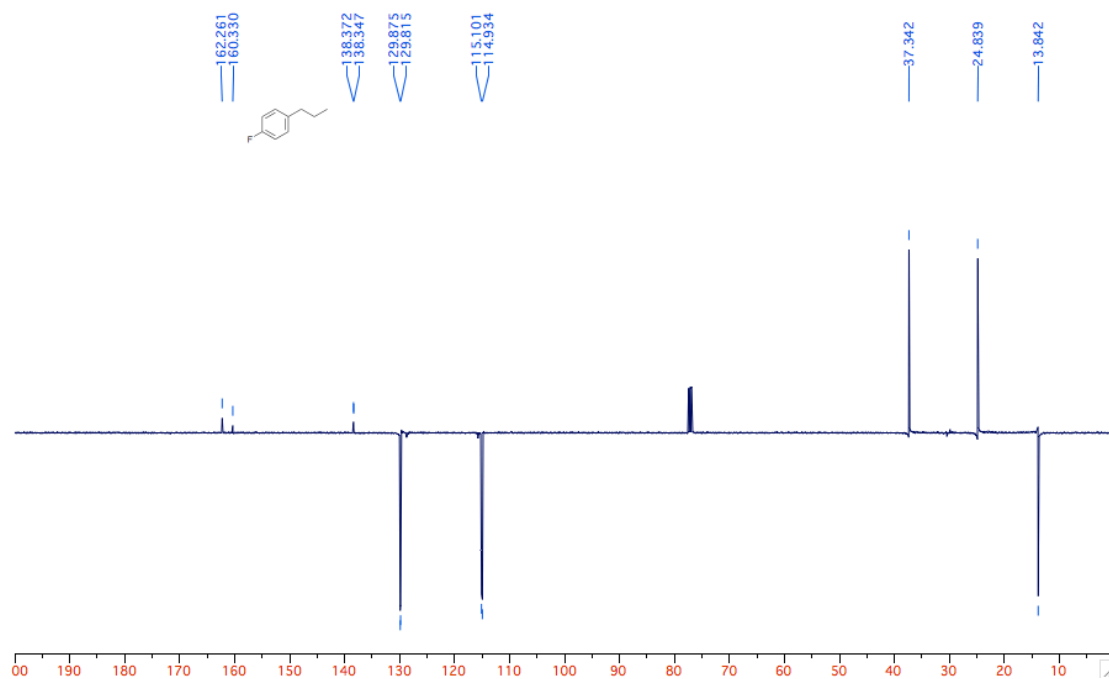

### <sup>1</sup>H NMR of 4-Methoxy-4'-methyl-1,1'-biphenyl

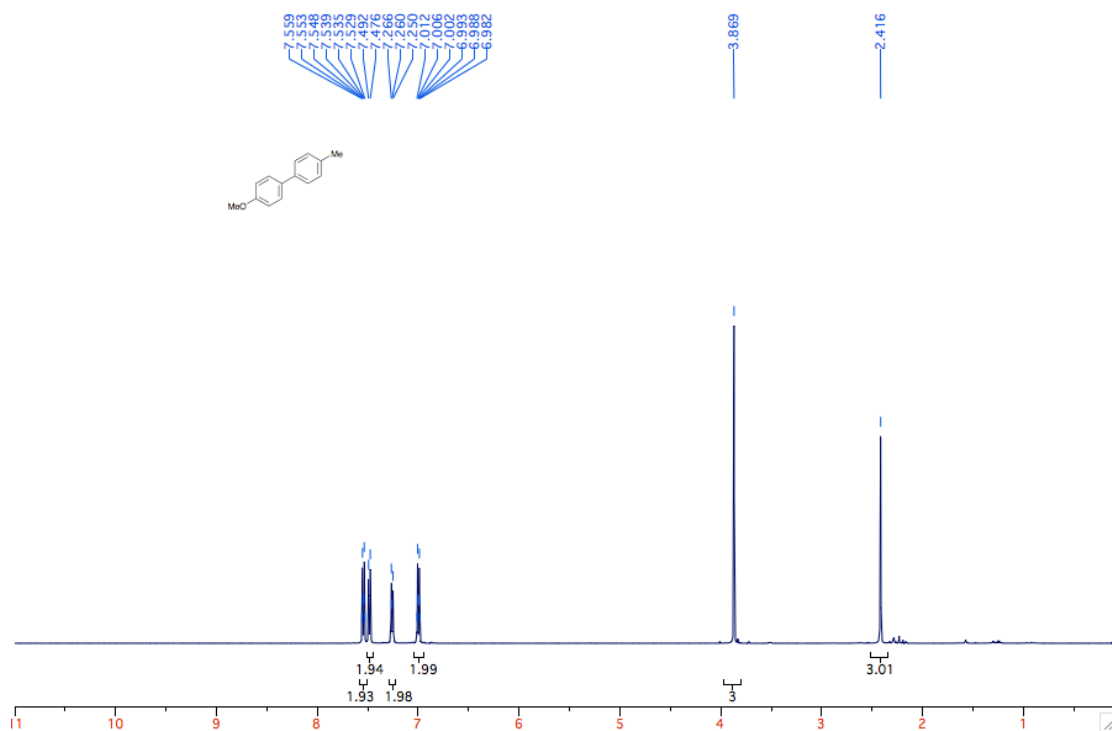

### <sup>13</sup>C NMR of 4-Methoxy-4'-methyl-1,1'-biphenyl

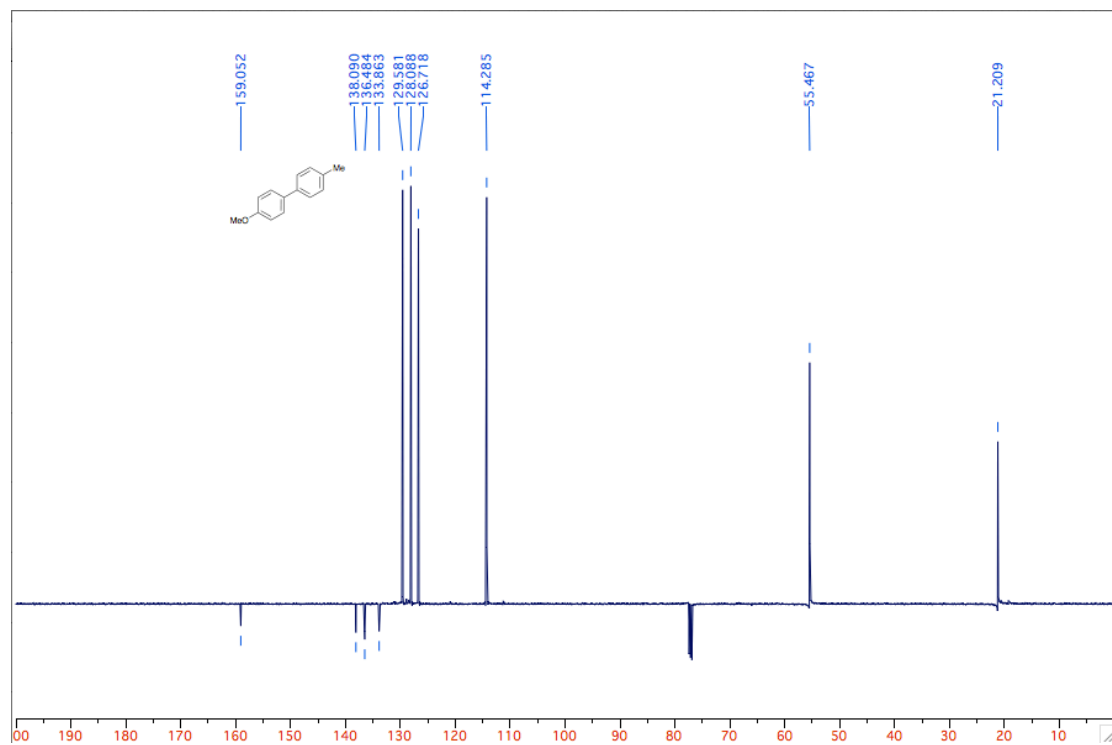



### <sup>1</sup>H NMR of 1-Methoxy-2-(nitromethyl)benzene, 3

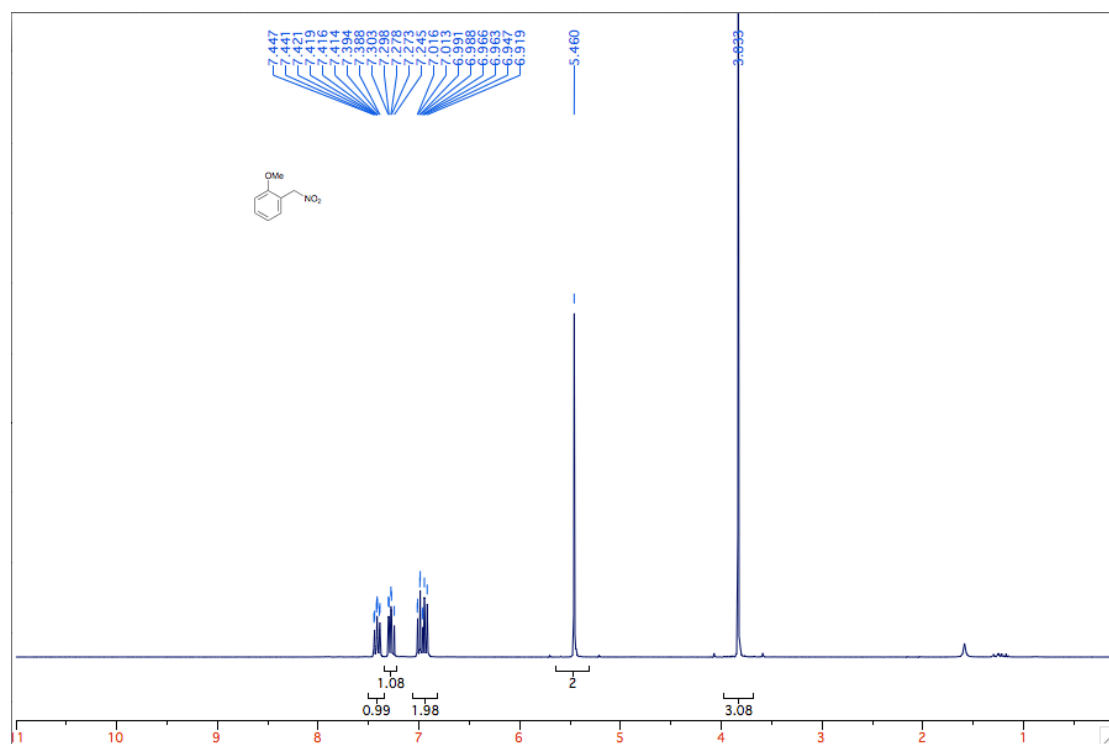

### <sup>13</sup>C NMR of 1-Methoxy-2-(nitromethyl)benzene, 3

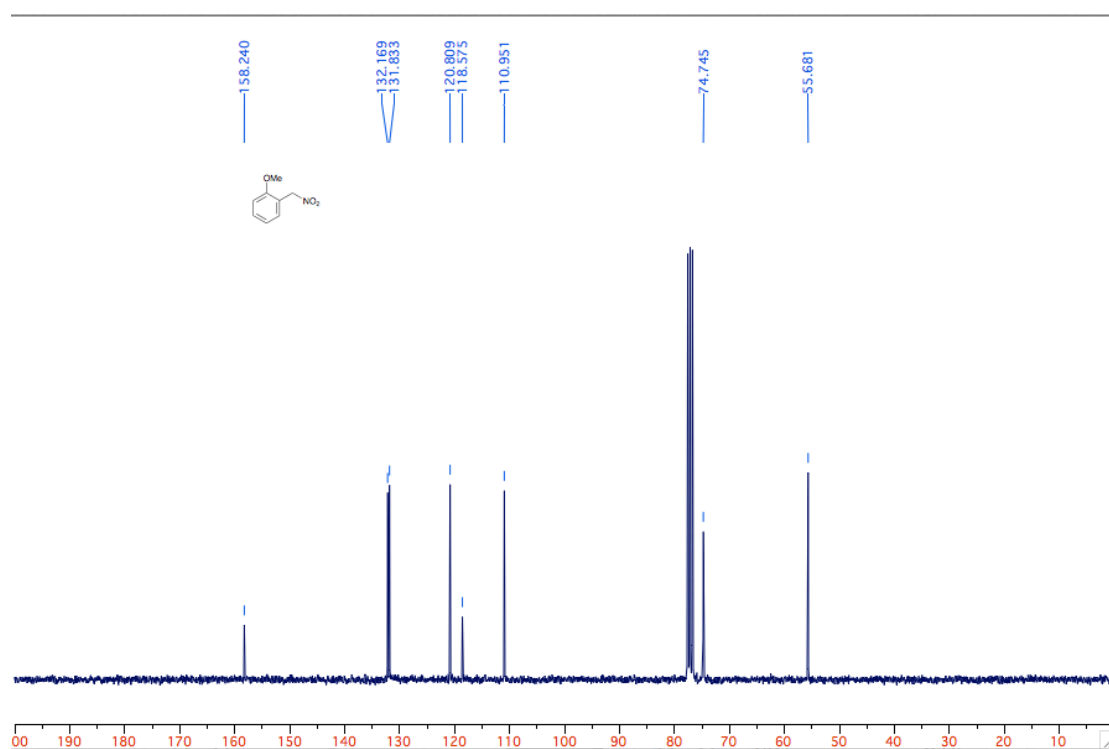

### <sup>1</sup>H NMR of 2-Methoxybenzonitrile, 5

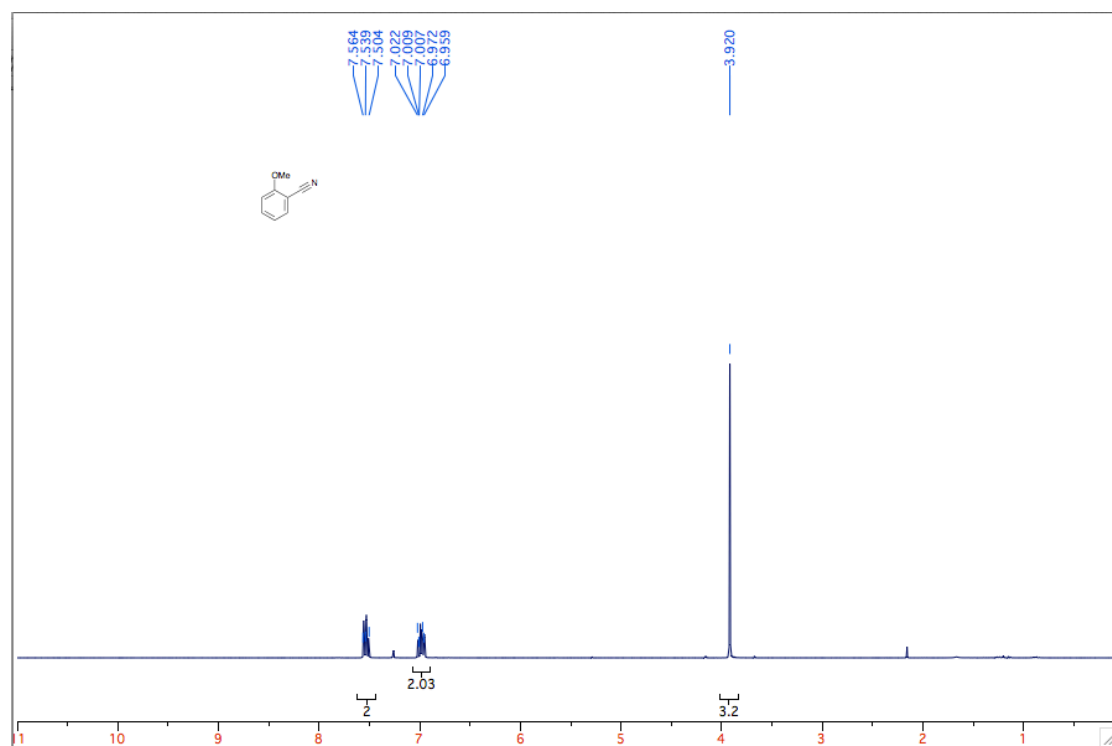

### <sup>13</sup>C NMR of 2-Methoxybenzonitrile, 5

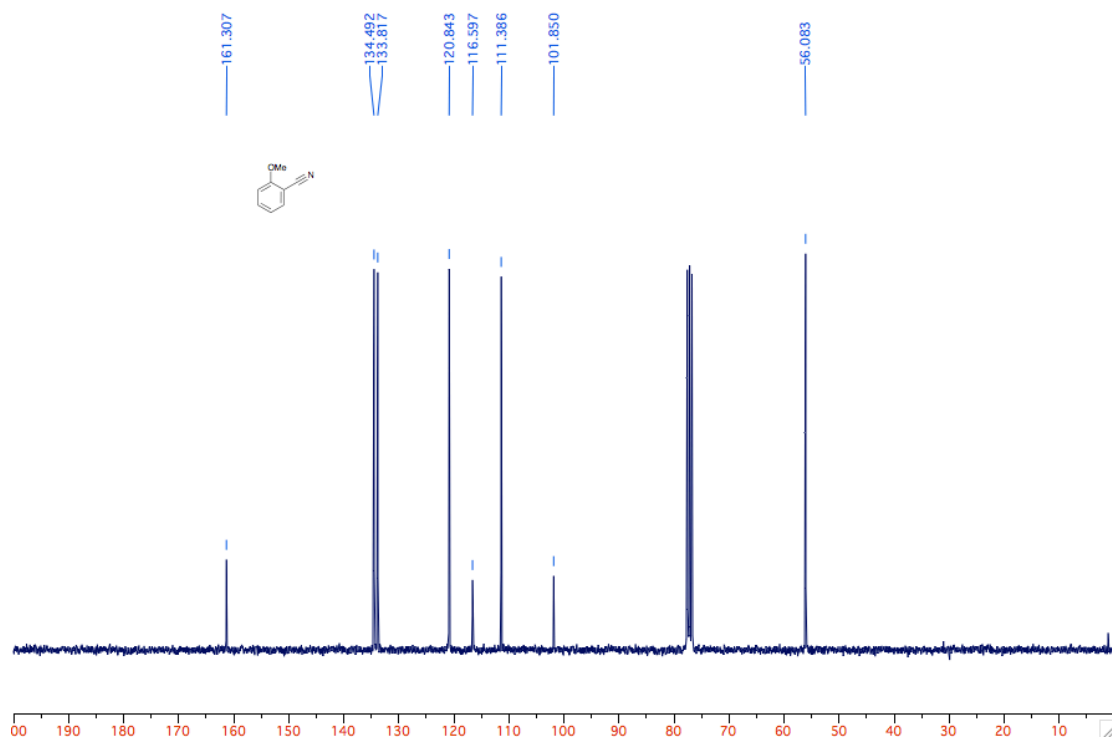

### <sup>1</sup>H NMR of 2-(4'-Methyl-[1,1'-biphenyl]-2-yl)benzo[d]oxazole, 7a

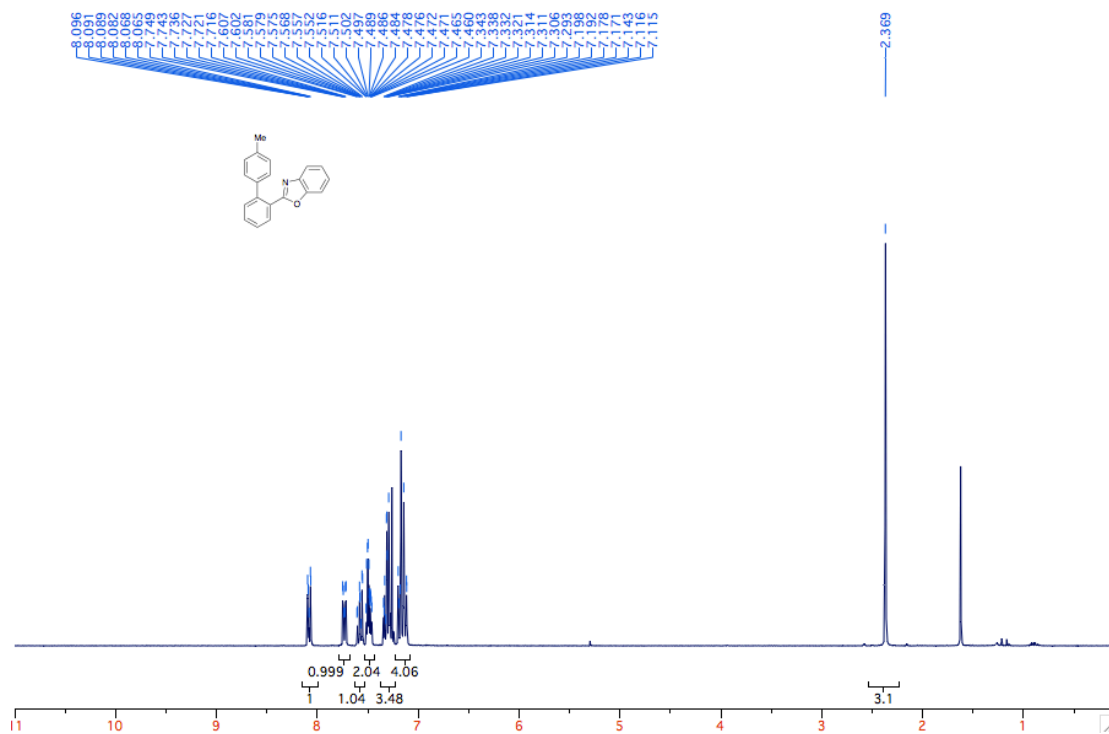

### <sup>13</sup>C NMR of 2-(4'-Methyl-[1,1'-biphenyl]-2-yl)benzo[d]oxazole, 7a

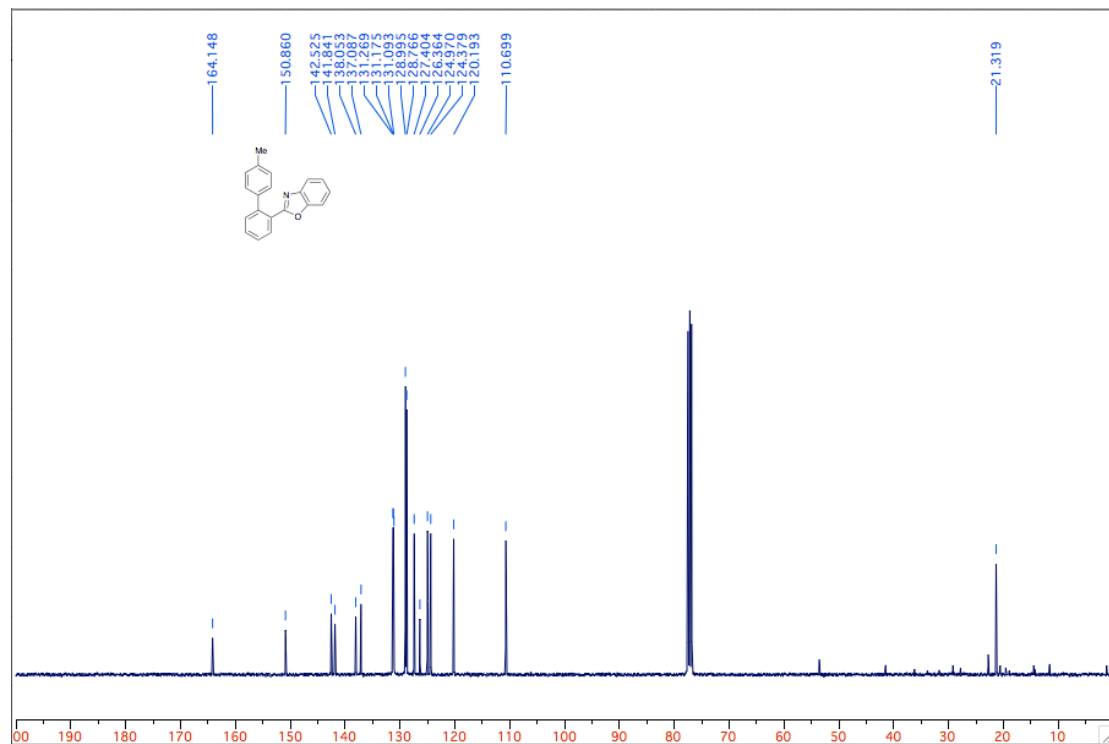

**<sup>1</sup>H NMR of 2-(4'-Fluoro-[1,1'-biphenyl]-2-yl)benzo[d]oxazole, 7b**

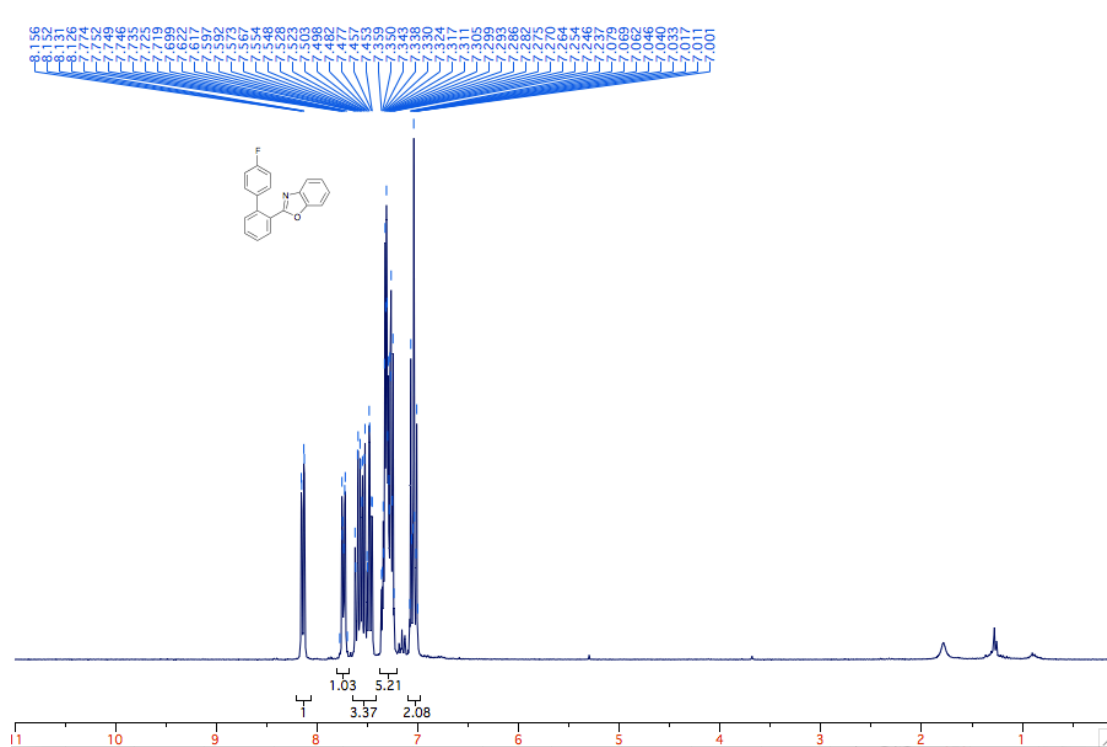

**<sup>13</sup>C NMR of 2-(4'-Fluoro-[1,1'-biphenyl]-2-yl)benzo[d]oxazole, 7b**

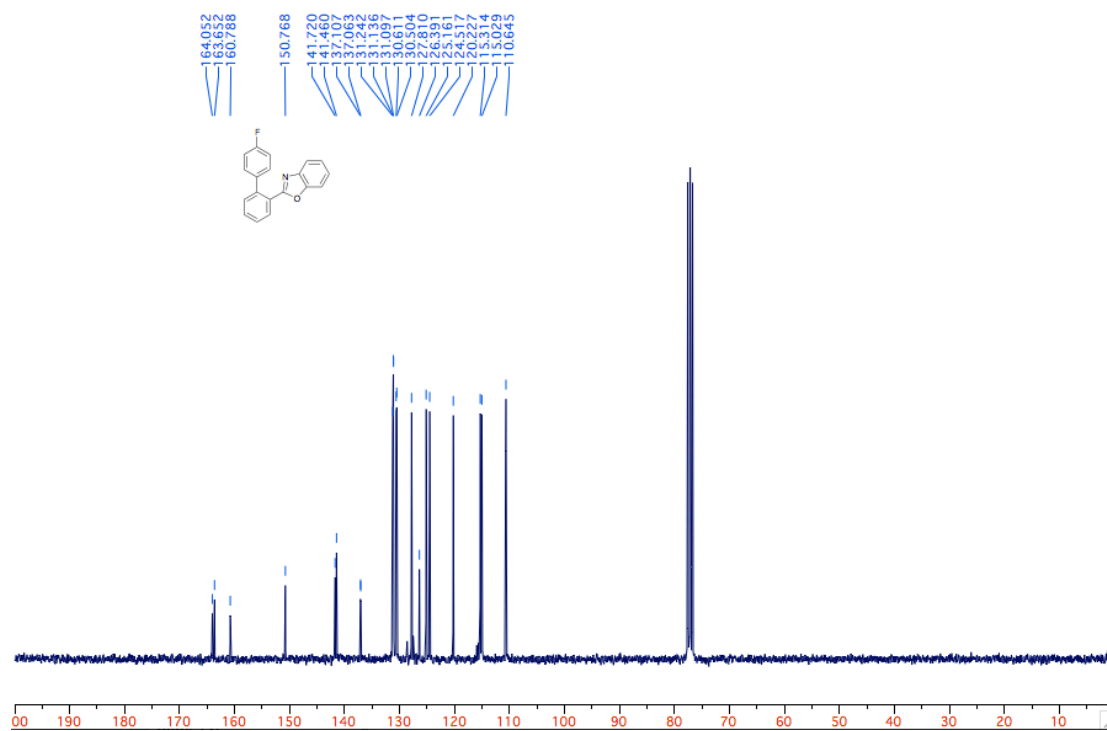

### <sup>1</sup>H NMR of 2-(2-(Thiophen-2-yl)phenyl)benzo[d]oxazole, 7c

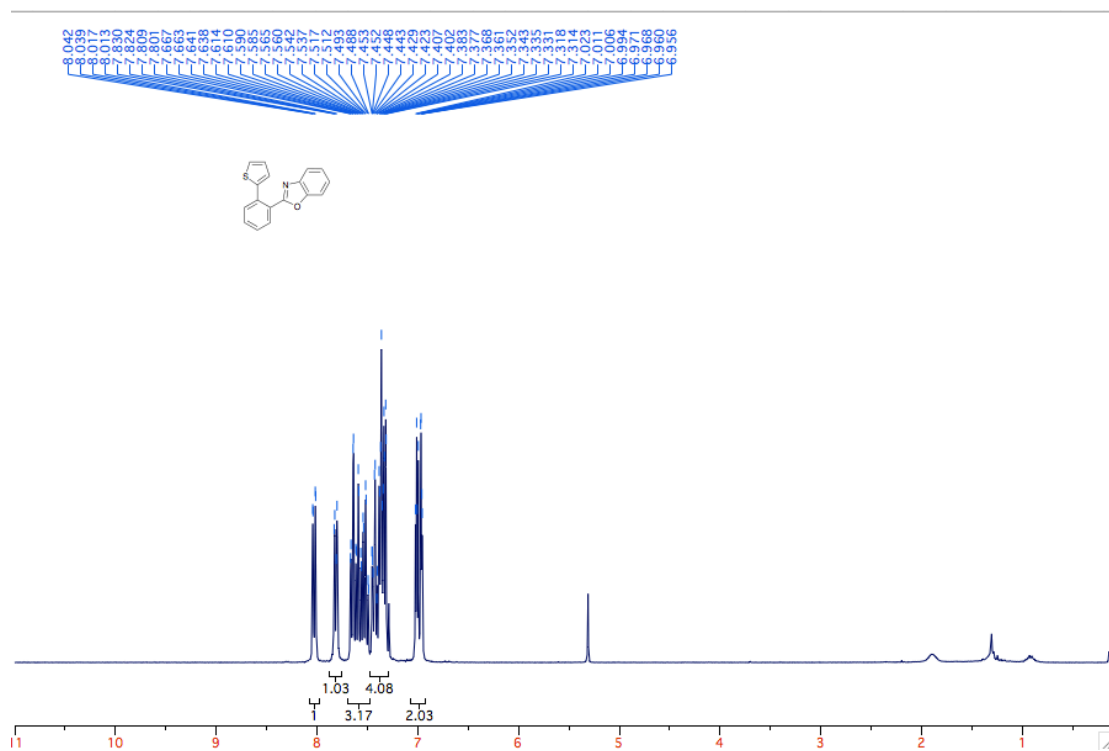

### <sup>13</sup>C NMR of 2-(2-(Thiophen-2-yl)phenyl)benzo[d]oxazole, 7c

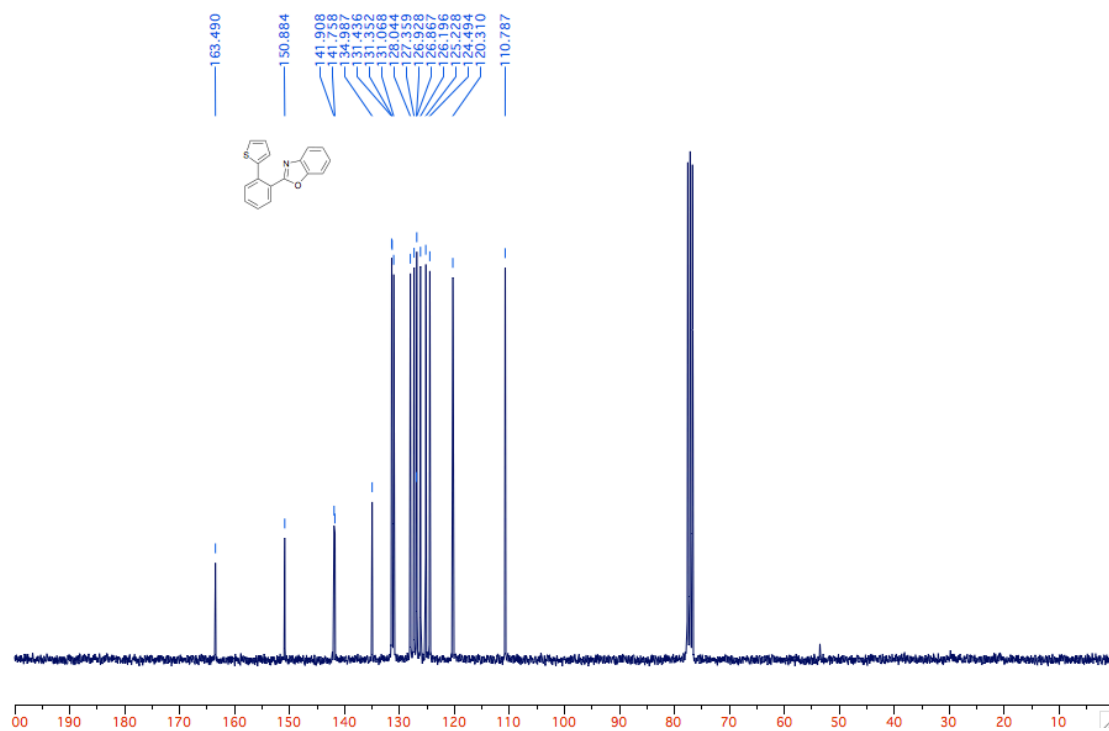

### <sup>1</sup>H NMR of 2-(2-Propylphenyl)benzo[d]oxazole, 7d

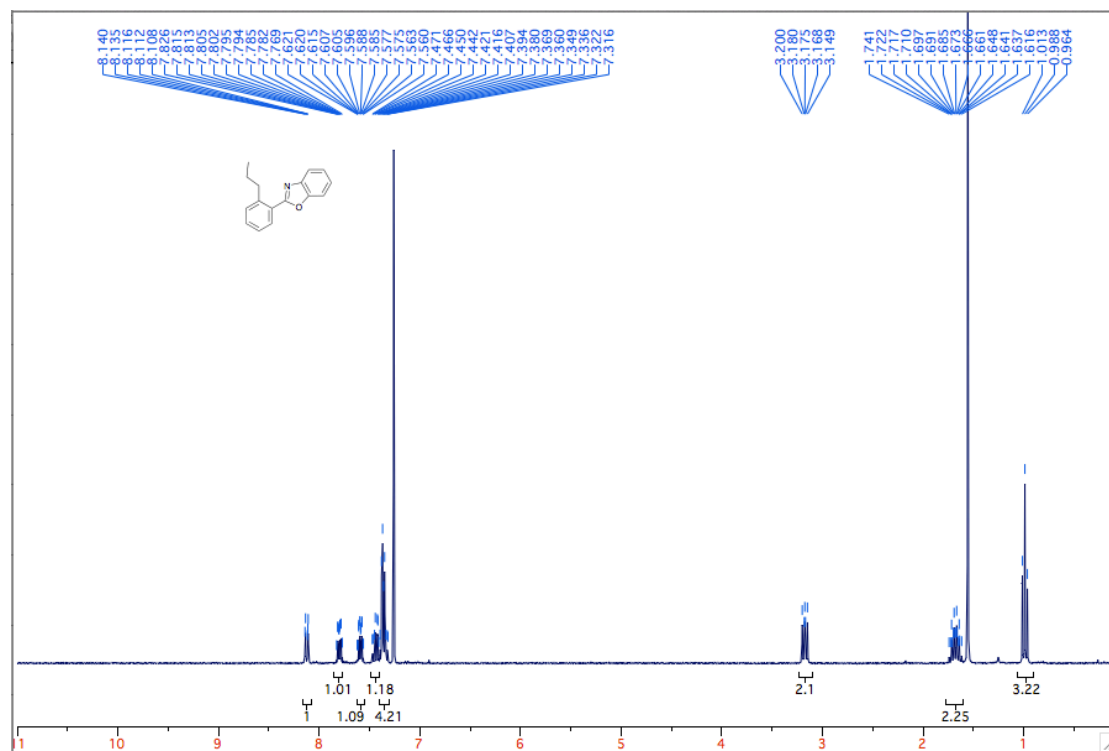

### <sup>13</sup>C NMR of 2-(2-Propylphenyl)benzo[d]oxazole, 7d

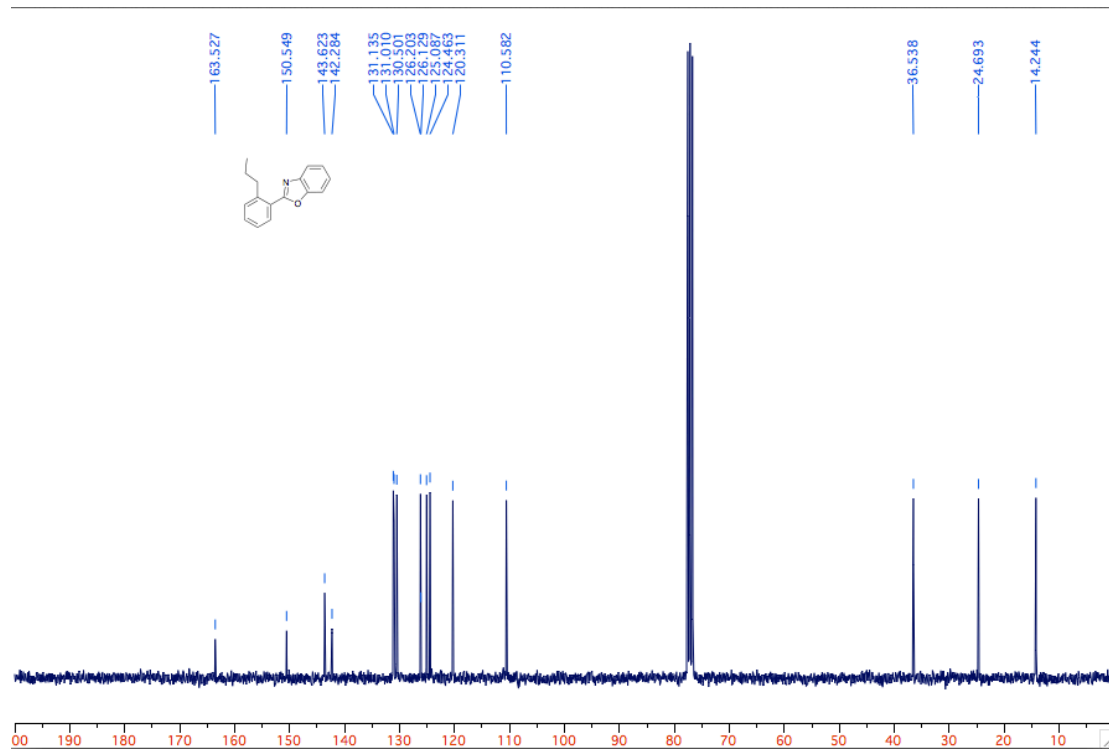



### <sup>1</sup>H NMR of 2-([1,1'-Biphenyl]-2-yl)benzo[d]oxazole, 7f

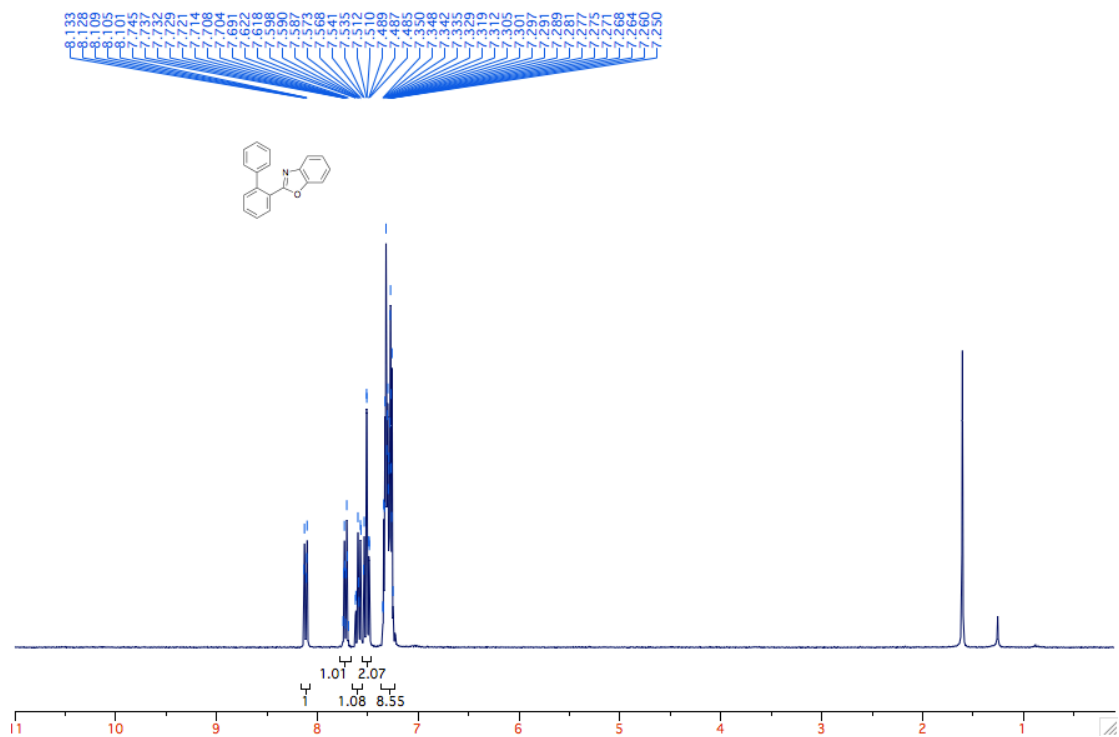

### <sup>13</sup>C NMR of 2-([1,1'-Biphenyl]-2-yl)benzo[d]oxazole, 7f

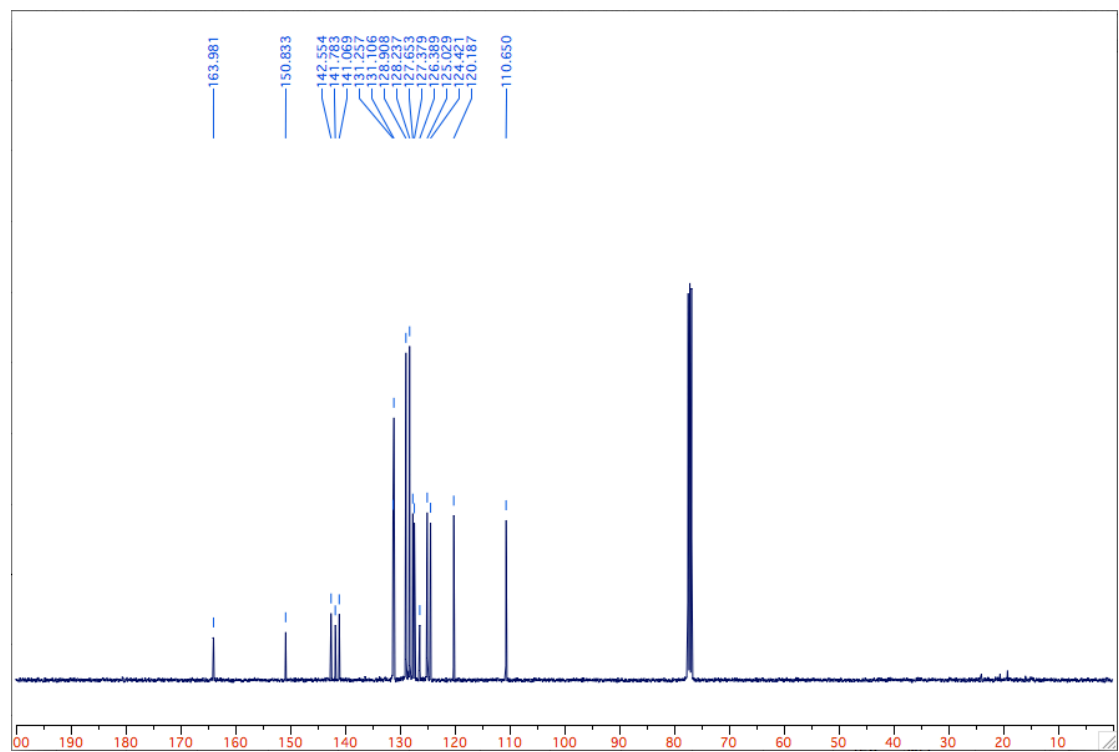



<sup>1</sup>H NMR of 2-(4'-Methoxy-[1,1'-biphenyl]-2-yl)benzo[d]oxazole, 7g

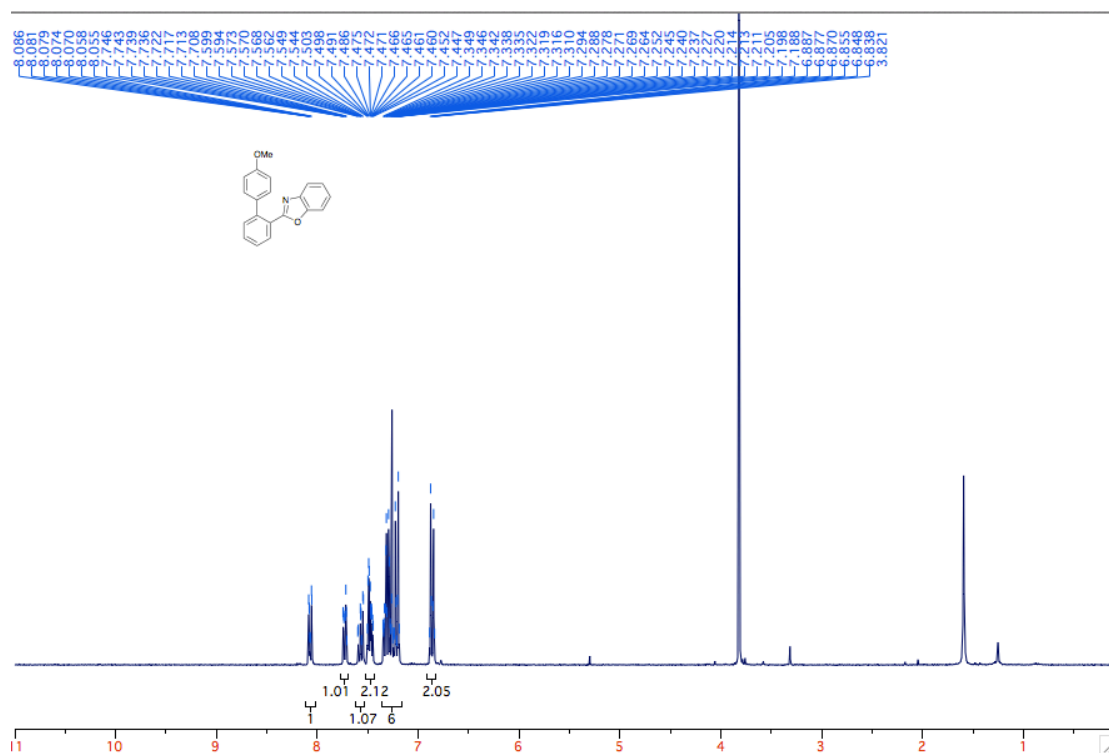

<sup>13</sup>C NMR of 2-(4'-Methoxy-[1,1'-biphenyl]-2-yl)benzo[d]oxazole, 7g

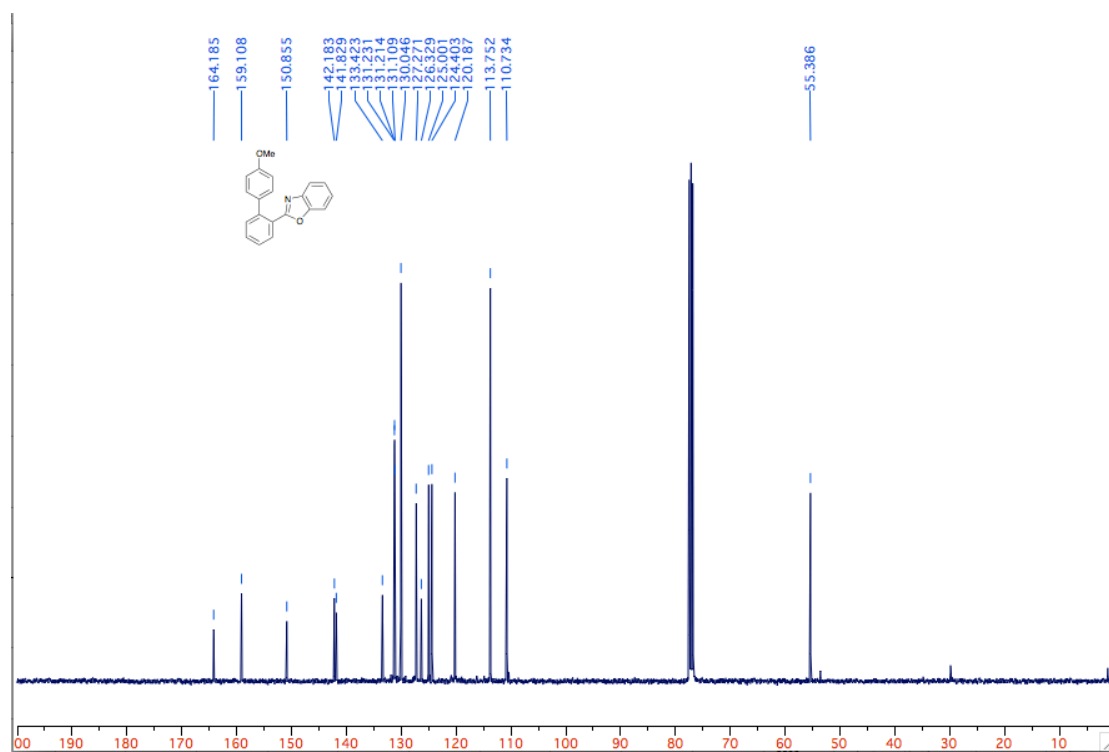

<sup>1</sup>H NMR of 2-(3',5'-bis(Trifluoromethyl)-[1,1'-biphenyl]-2-yl)benzo[d]oxazole, 7h

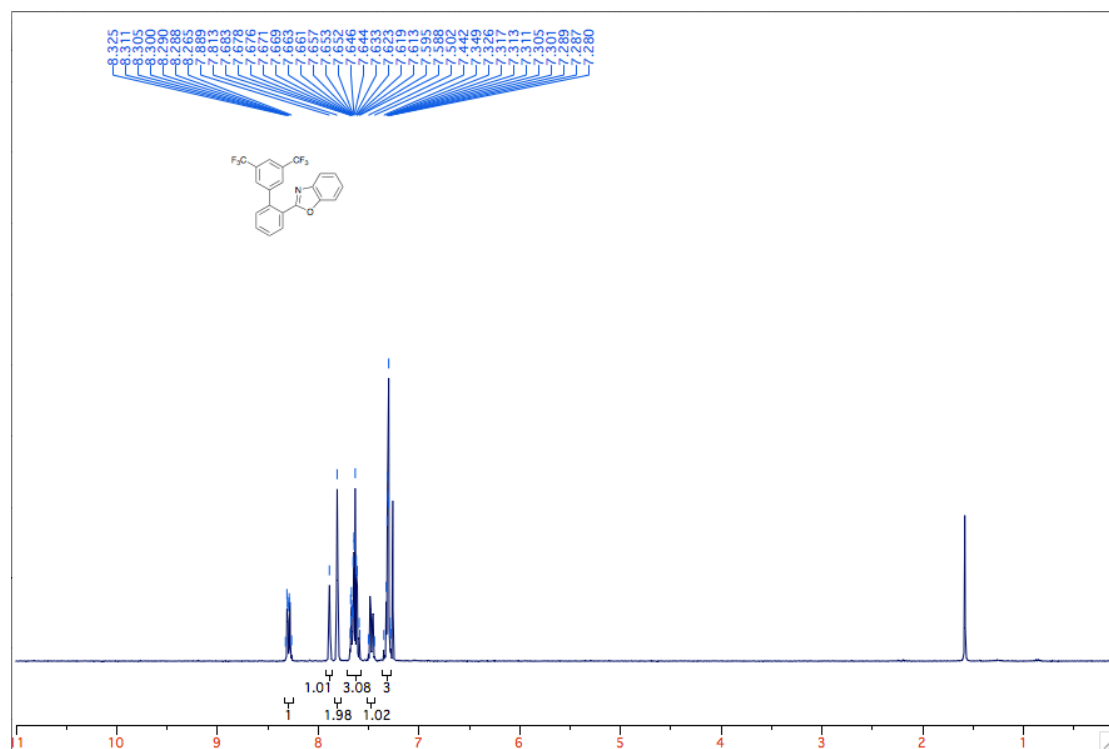

<sup>13</sup>C NMR of 2-(3',5'-bis(Trifluoromethyl)-[1,1'-biphenyl]-2-yl)benzo[d]oxazole, 7h

7h

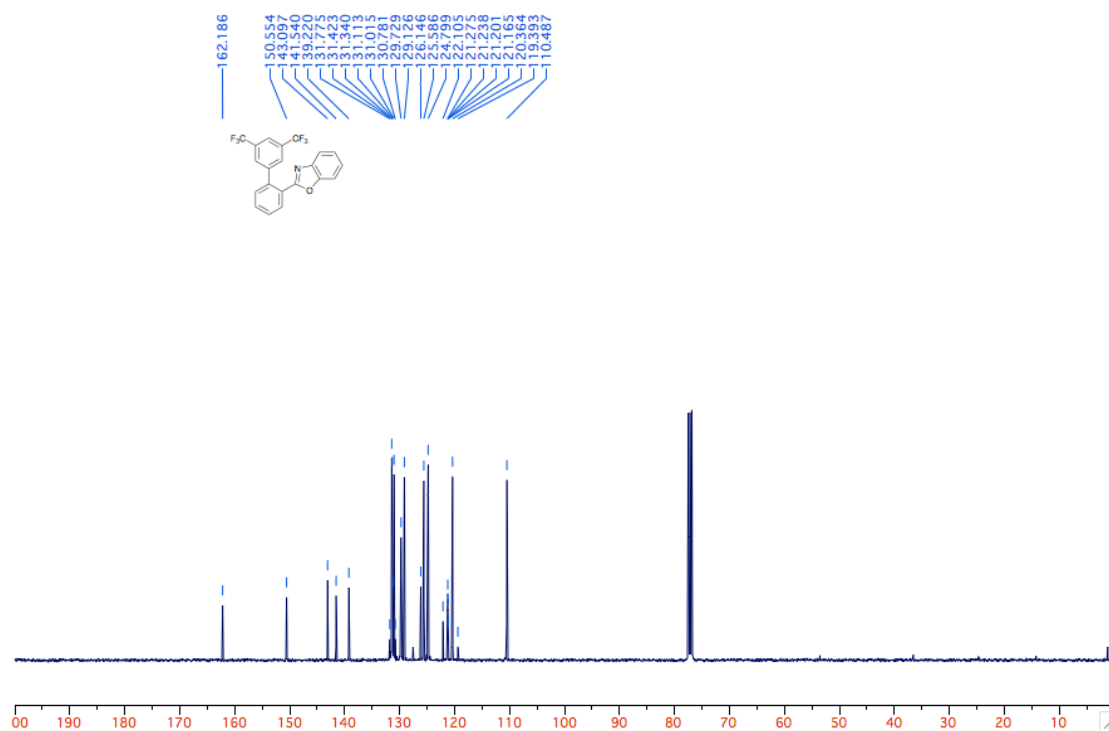

Supplement: c4cc04939j1.pdf [file c4cc04939j1.pdf]
